# Supplementary material for: Fusion and planarization of bisBODIPY: a new family of photostable near infrared dyes
Source: Royal Society of Chemistry journal article supplement (doi:10.1039/c5cc07304a), 2015-01-01
Supplement: c5cc07304a1.pdf [file c5cc07304a1.pdf]

## Supporting Information for

# **Fusion and Planarization of BisBODIPY: a New Family of Photostable Near Infrared Dyes**

*Changjiang Yu, Lijuan Jiao,\* Tingting Li, Qinghua Wu, Wei Miao, Jun Wang, Yun  
Wei, Xiaolong Mu and Erhong Hao\**

The Key Laboratory of Functional Molecular Solids, Ministry of Education; Anhui Laboratory of  
Molecule-Based Materials; School of Chemistry and Materials Science, Anhui Normal University,  
Wuhu, Anhui, China 241000.

\*To whom correspondence should be addressed.

E-mail: [jiao421@mail.ahnu.edu.cn](mailto:jiao421@mail.ahnu.edu.cn), [haoehong@mail.ahnu.edu.cn](mailto:haoehong@mail.ahnu.edu.cn)

### **Contents:**

|                                                                                   |            |
|-----------------------------------------------------------------------------------|------------|
| <b>1. General Information.....</b>                                                | <b>S2</b>  |
| <b>2. X-Ray crystal dimer and packing diagram.....</b>                            | <b>S3</b>  |
| <b>3. Photophysical Properties .....</b>                                          | <b>S5</b>  |
| <b>4. Cyclic voltammograms of BODIPY M, BBPs 1-3 and bisBODIPY 4.....</b>         | <b>S20</b> |
| <b>5. Experimental Section.....</b>                                               | <b>S23</b> |
| <b>6. <sup>1</sup>H NMR and <sup>13</sup>C NMR spectra for the compounds.....</b> | <b>S26</b> |
| <b>7. Mass spectra for all the compounds.....</b>                                 | <b>S32</b> |
| <b>8. DFT calculation.....</b>                                                    | <b>S34</b> |

## 1. General Information

Reagents and solvents were used as received from commercial suppliers unless noted otherwise. All reactions were performed in oven-dried or flame-dried glassware unless otherwise stated, and were monitored by TLC using 0.25 mm silica gel plates with UV indicator (HSGF 254). Flash column chromatography was performed using silica gel (200–400 mesh). For thin-layer chromatography (TLC). <sup>1</sup>H NMR (300 MHz) and <sup>13</sup>C NMR (75 MHz or 125 MHz) spectra were recorded at 300 MHz or 500 MHz NMR spectrometer in CDCl<sub>3</sub> or *d*<sub>6</sub>-DMSO. Chemical shifts (δ) are given in ppm relative to CDCl<sub>3</sub> (7.26 ppm for <sup>1</sup>H and 77 ppm for <sup>13</sup>C) or *d*<sub>6</sub>-DMSO (2.54 ppm for <sup>1</sup>H and 39.9 ppm for <sup>13</sup>C) or to internal TMS (δ = 0 ppm) as internal standard. Data are reported as follows: chemical shift, multiplicity, coupling constants and integration. High-resolution mass spectra (HRMS) were obtained using APCI-TOF in positive mode.

Crystals of bisBODIPY **4** and BBP **1** suitable for X-ray analysis were obtained by slow evaporation of a concentrated solution of the compound in a mixture of CH<sub>2</sub>Cl<sub>2</sub>/n-hexane. Diffraction was performed on a Bruker SMART APEXII CCD area detector diffractometer using graphite-monochromated Mo-Kα radiation (λ = 0.71073 Å) at 293(2) K, with φ and ω scan techniques. An empirical absorption correction was applied using the SADABS program.<sup>1</sup> All structures were solved by direct methods, completed by subsequent difference Fourier syntheses, and refined anisotropically for all non-hydrogen atoms by full-matrix least-squares calculations based on F<sup>2</sup> using the SHELXTL program package.<sup>2</sup> The hydrogen atom coordinates were calculated with SHELXTL by using an appropriate riding model with varied thermal parameters. The residual electron densities were of no chemical significance.

UV-visible absorption spectra and Fluorescence emission spectra were recorded on a commercial spectrophotometer (190-1100 nm scan range, Shimadzu UV-4100, Edinburgh Instruments FS5 and FLS 920). Relative fluorescence quantum efficiencies of BODIPY derivatives were obtained by comparing the areas under the corrected emission spectrum of the test sample in various solvents with fluorescein in 0.1 M NaOH aqueous solution (φ = 0.90)<sup>3a</sup>, Rhodamine B (φ = 0.49 in ethanol)<sup>3b</sup>, 1,7-diphenyl-3,5-di(*p*-methoxyphenyl)-azadipyromethene (φ = 0.36 in chloroform)<sup>3c</sup>, and ICG (φ = 0.12 in DMSO)<sup>3d</sup>. Non-degassed, spectroscopic grade solvents and a 10 mm quartz cuvette were used. Dilute solutions (0.01 < A < 0.05) were used to

minimize the reabsorption effects. Quantum yields were determined using the following equation<sup>3e</sup>:

$$\Phi_X = \Phi_S (I_X/I_S) (A_S/A_X) (n_X/n_S)^2$$

Where  $\Phi_S$  stands for the reported quantum yield of the standard,  $I$  stands for the integrated emission spectra,  $A$  stands for the absorbance at the excitation wavelength and  $n$  stands for the refractive index of the solvent being used.  $X$  subscript stands for the test sample, and  $S$  subscript stands for the standard. The photostabilities of BBPs **2a** and **3a** were studied by continuous irradiation with a Xe lamp (500 W) in DMSO.

Cyclic voltammetry experiments were performed with a Bioanalytical Systems Inc. (BASi) Epsilon potentiostat and analyzed using BASi Epsilon software. Electrochemical cells consisted of a three-electrode setup including a glassy carbon as working electrode, platinum wire as counter electrode, and saturated calomel electrode (SCE) as pseudo reference electrode. Experiments were run at 20 mV s<sup>-1</sup> scan rates in degassed dichloromethane solutions of BODIPY **M**, BBPs **1-3**, and bisBODIPY **4** (~1 mM) and supporting electrolyte (0.1 M tetrabutylammonium hexafluorophosphate) at room temperature. Cyclic voltammograms were referenced against an external standard (~1 mM potassium ferricyanide) and corrected for external cell resistance using the BASi Epsilon software.

## 2. X-ray crystal dimer and packing diagram

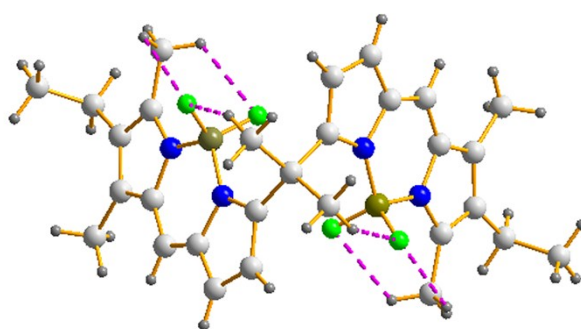

**Figure S1.** The dimer structures of carbon-bridged bisBODIPY **4**. C, light gray; H, gray; N, blue; B, dark yellow; F, bright green.

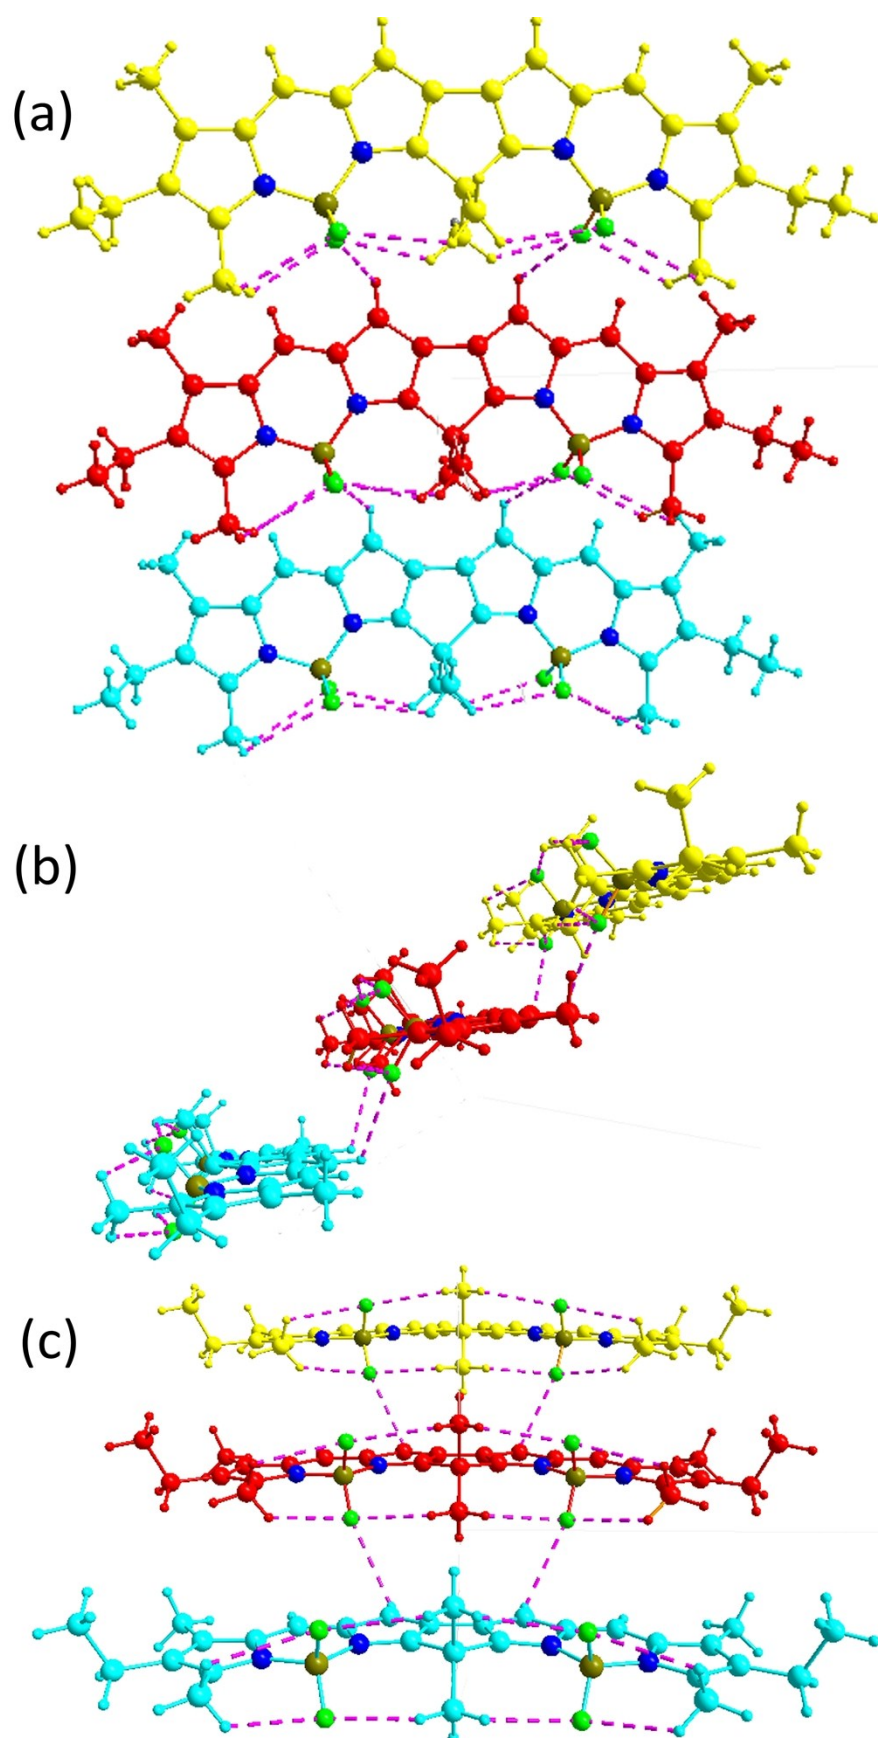

**Figure S2.** (a) top, (b) side, and (c) front views of X-Ray structure packing of BBP 1.

### 3. Photophysical Properties

**Table S1:** Photophysical properties of BODIPY **M**, BBPs **1-3**, and bisBODIPY **4** in different solvents at room temperature.

| dyes      | solvents     | $\lambda_{\text{abs}}^{\text{max}}$ (nm) | $\lambda_{\text{em}}^{\text{max}}$ (nm) | $\epsilon_{\text{max}}^{\text{a}}$ | $\phi^{\text{b}}$ | Stokes Shift (cm <sup>-1</sup> ) |
|-----------|--------------|------------------------------------------|-----------------------------------------|------------------------------------|-------------------|----------------------------------|
| <b>M</b>  | Hexane       | 510                                      | 515                                     | 41000                              | 0.577             | 190                              |
|           | Toluene      | 510                                      | 521                                     | 40500                              | 0.582             | 414                              |
|           | DCM          | 500                                      | 519                                     | 33500                              | 0.539             | 732                              |
|           | THF          | 502                                      | 517                                     | 40400                              | 0.582             | 578                              |
|           | Acetonitrile | 494                                      | 516                                     | 34700                              | 0.536             | 863                              |
|           | MeOH         | 498                                      | 516                                     | 35600                              | 0.489             | 700                              |
| <b>4</b>  | Hexane       | 538                                      | 600                                     | 133900                             | 0.187             | 1921                             |
|           | Toluene      | 538                                      | 603                                     | 107000                             | 0.137             | 2004                             |
|           | DCM          | 534                                      | 596                                     | 109000                             | 0.167             | 1948                             |
|           | THF          | 534                                      | 597                                     | 110600                             | 0.193             | 1976                             |
|           | Acetonitrile | 530                                      | 540                                     | 93700                              | 0.073             | 349                              |
|           | MeOH         | 532                                      | 585                                     | 106300                             | 0.059             | 1703                             |
| <b>1</b>  | Hexane       | 696                                      | 700                                     | 117600                             | 0.450             | 82                               |
|           | Toluene      | 696                                      | 705                                     | 135500                             | 0.547             | 183                              |
|           | DCM          | 688                                      | 701                                     | 132900                             | 0.544             | 270                              |
|           | THF          | 686                                      | 697                                     | 149600                             | 0.569             | 230                              |
|           | Acetonitrile | 676                                      | 690                                     | 116900                             | 0.310             | 300                              |
|           | MeOH         | 678                                      | 690                                     | 144000                             | 0.304             | 257                              |
| <b>2a</b> | Hexane       | 750                                      | 754                                     | 167200                             | 0.320             | 71                               |
|           | Toluene      | 748                                      | 761                                     | 139400                             | 0.463             | 228                              |
|           | DCM          | 744                                      | 758                                     | 131100                             | 0.217             | 248                              |
|           | THF          | 742                                      | 753                                     | 138000                             | 0.283             | 197                              |
|           | Acetonitrile | 728                                      | 746                                     | 120100                             | 0.106             | 331                              |
|           | DMSO         | 736                                      | 746                                     | 128100                             | 0.112             | 182                              |
|           | MeOH         | 730                                      | 754                                     | 107600                             | 0.104             | 436                              |
| <b>2b</b> | Hexane       | 764                                      | 773                                     | 81400                              | 0.174             | 152                              |
|           | Toluene      | 772                                      | 789                                     | 76600                              | 0.316             | 279                              |
|           | DCM          | 766                                      | 791                                     | 65800                              | 0.063             | 413                              |
|           | THF          | 762                                      | 785                                     | 69800                              | 0.058             | 385                              |
|           | Acetonitrile | 751                                      | 788                                     | 63600                              | 0.005             | 625                              |
|           | DMSO         | 763                                      | 779                                     | 68500                              | 0.004             | 269                              |
|           | MeOH         | 752                                      | 798                                     | 59800                              | 0.008             | 767                              |
| <b>3a</b> | Hexane       | 796                                      | 804                                     | 69000                              | 0.274             | 140                              |
|           | Toluene      | 800                                      | 807                                     | 61500                              | 0.211             | 154                              |
|           | DCM          | 792                                      | 807                                     | 58700                              | 0.098             | 219                              |
|           | THF          | 788                                      | 804                                     | 59800                              | 0.139             | 157                              |
|           | Acetonitrile | 776                                      | 796                                     | 50600                              | 0.031             | 292                              |
|           | DMSO         | 786                                      | 795                                     | 61300                              | 0.075             | 144                              |

|           |              |     |     |       |       |     |
|-----------|--------------|-----|-----|-------|-------|-----|
|           | MeOH         | 778 | 803 | 47000 | 0.046 | 400 |
|           | Hexane       | 832 | 845 | 55600 | 0.070 | 185 |
|           | Toluene      | 842 | 861 | 61400 | 0.057 | 262 |
|           | DCM          | 834 | 866 | 68900 | 0.008 | 443 |
| <b>3b</b> | THF          | 830 | 865 | 71400 | 0.015 | 487 |
|           | Acetonitrile | 820 | 867 | 65000 | 0.001 | 661 |
|           | DMSO         | 834 | 877 | 74100 | 0.002 | 588 |
|           | MeOH         | 820 | 865 | 59600 | 0.002 | 634 |

<sup>a</sup>Molar absorption coefficient are in the maximum of the highest peak. <sup>b</sup>Fluorescence quantum yields were calculated using Fluorescein ( $\phi = 0.90$  in 0.1 M NaOH solution) for BODIPY **M**, Rhodamine B ( $\phi = 0.49$  in ethanol) for bisBODIPY **4**, 1,7-diphenyl-3,5-di(*p*-methoxyphenyl)-azadipyrrmethene ( $\phi = 0.36$  in chloroform) for BBP **1**, and ICG ( $\phi = 0.12$  in DMSO for BBP **2a-b** and **3a-b** as the reference, and excited wavelengths were 460 nm for BODIPY **M**, 485 nm for bisBODIPY **4**, 640 nm for BBP **1**, 700 nm for BBP **2a-b** and **3a**, and 740 nm for BBP **3b**. The standard errors are less than 5%.

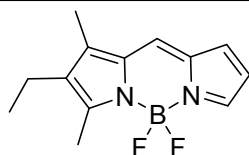

monomeric BODIPY **M**

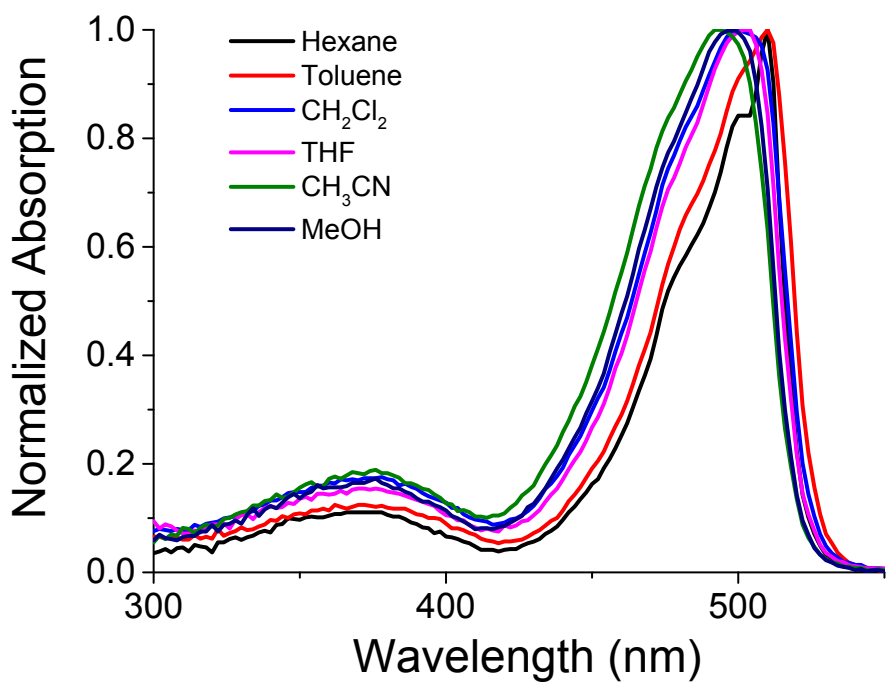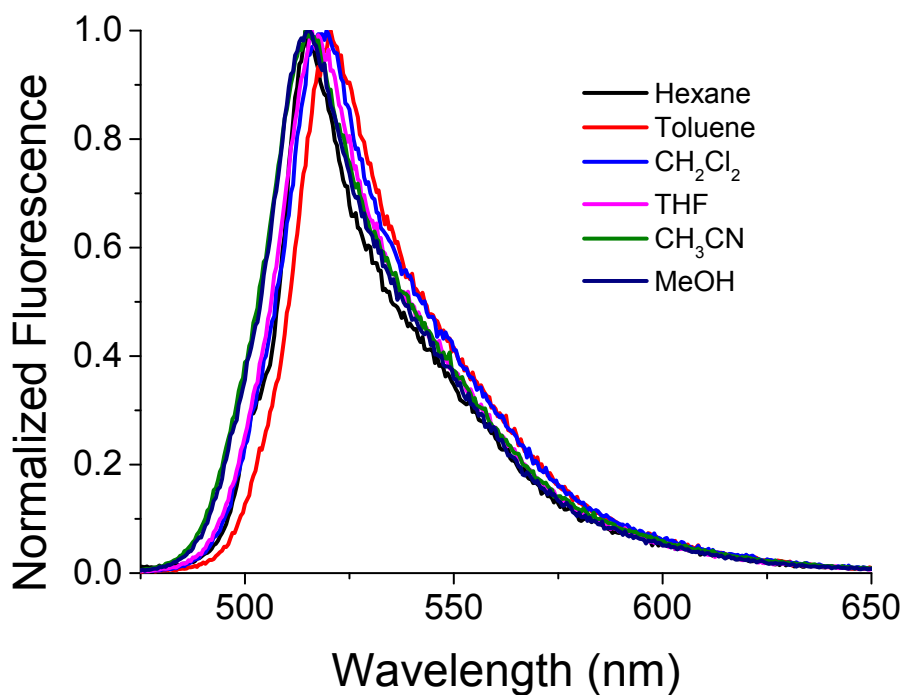

**Figure S3.** Normalized absorption (top) and emission (bottom) spectra of BODIPY **M** recorded in different solvents, excited at 460 nm.

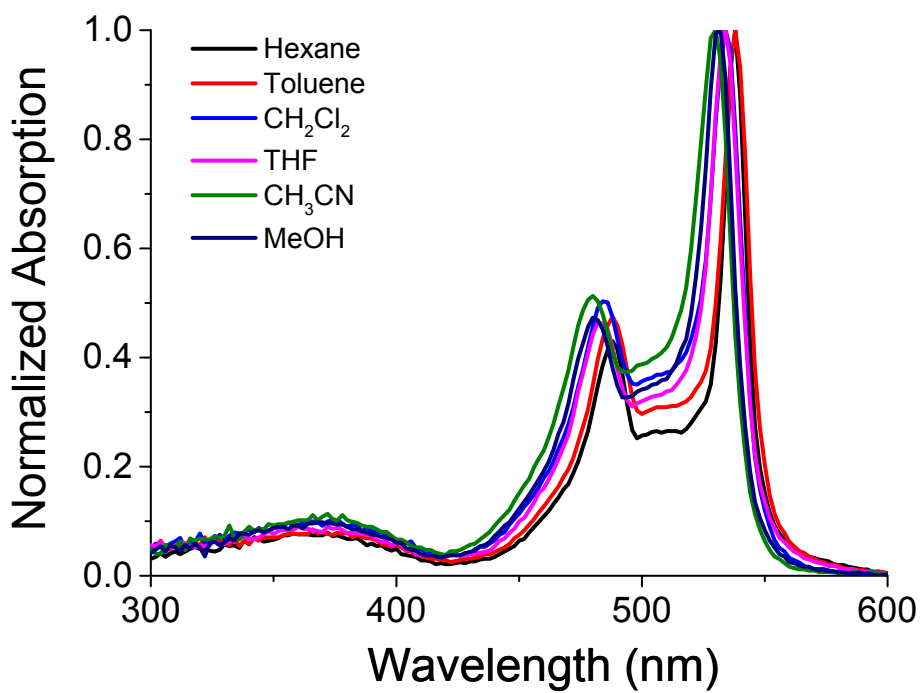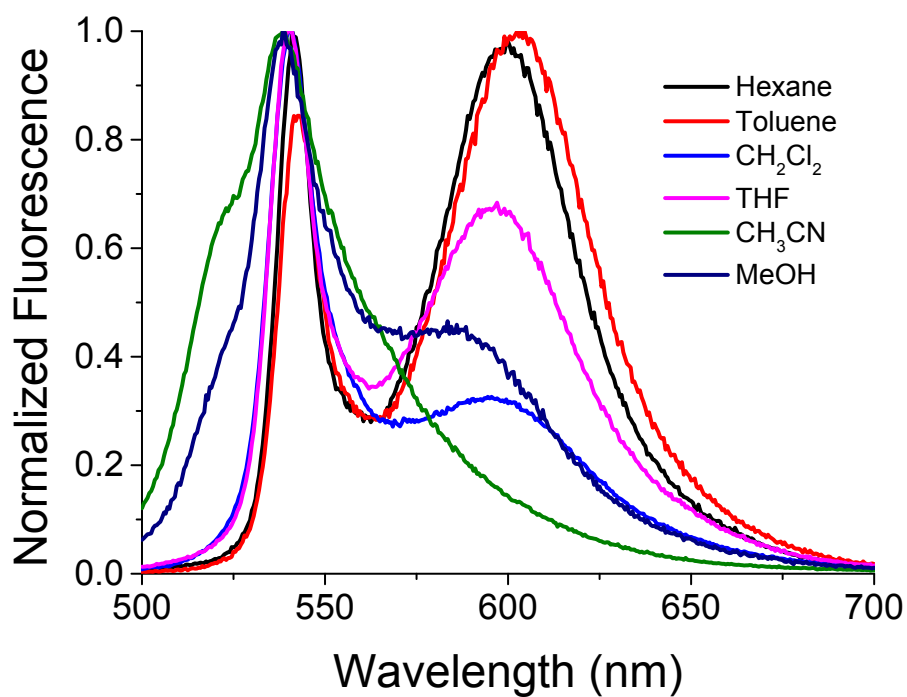

**Figure S4.** Normalized absorption (top) and emission (bottom) spectra of bisBODIPY 4 recorded in different solvents, excited at 485 nm.



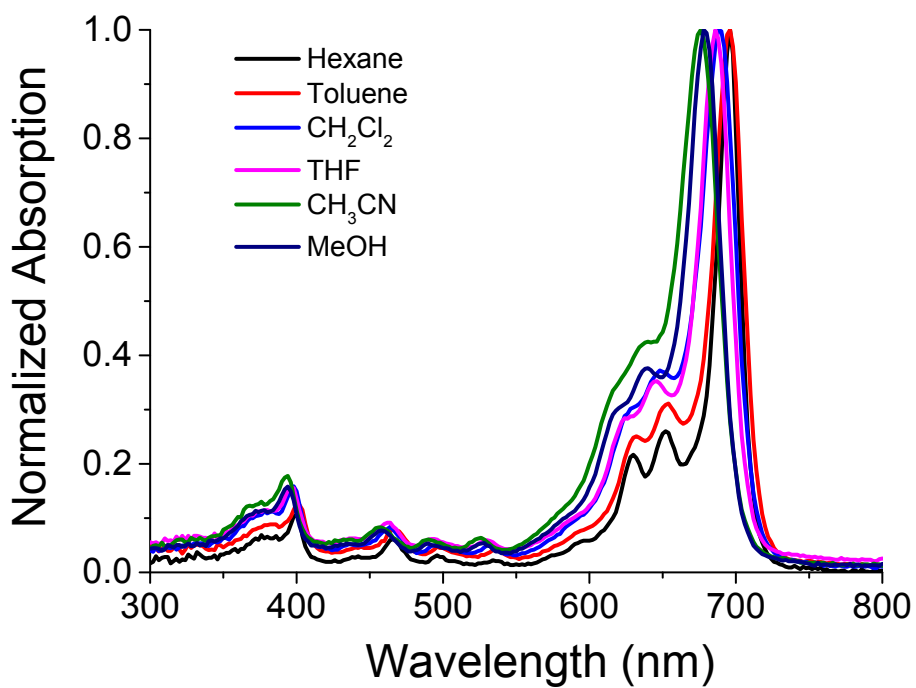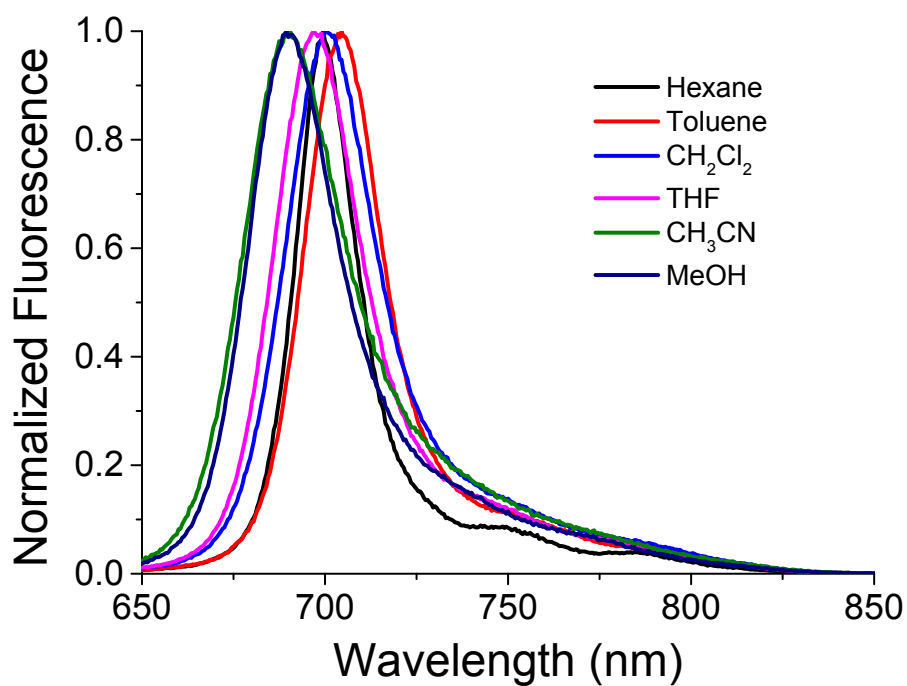

**Figure S5.** Normalized absorption (top) and emission (bottom) spectra of BBP 1 recorded in different solvents, excited at 640 nm.

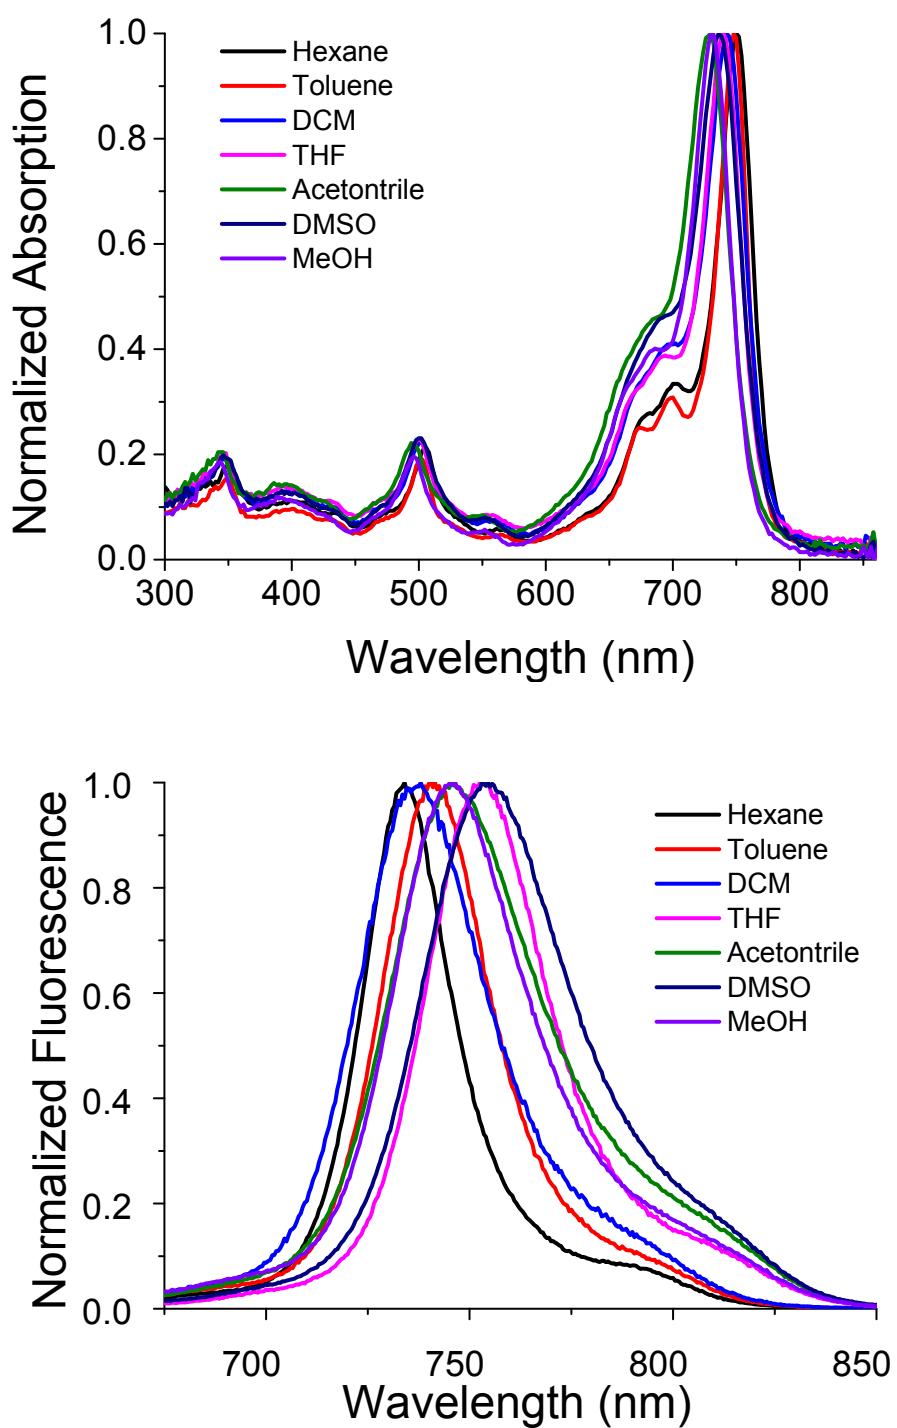

**Figure S6.** Normalized absorption (top) and emission (bottom) spectra of BBP **2a** recorded in different solvents, excited at 500 nm.

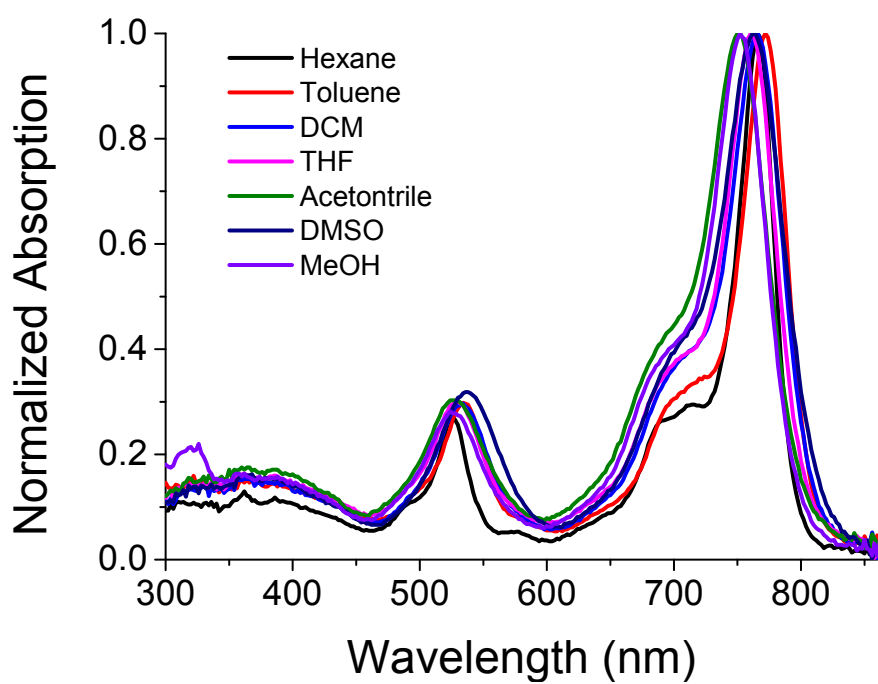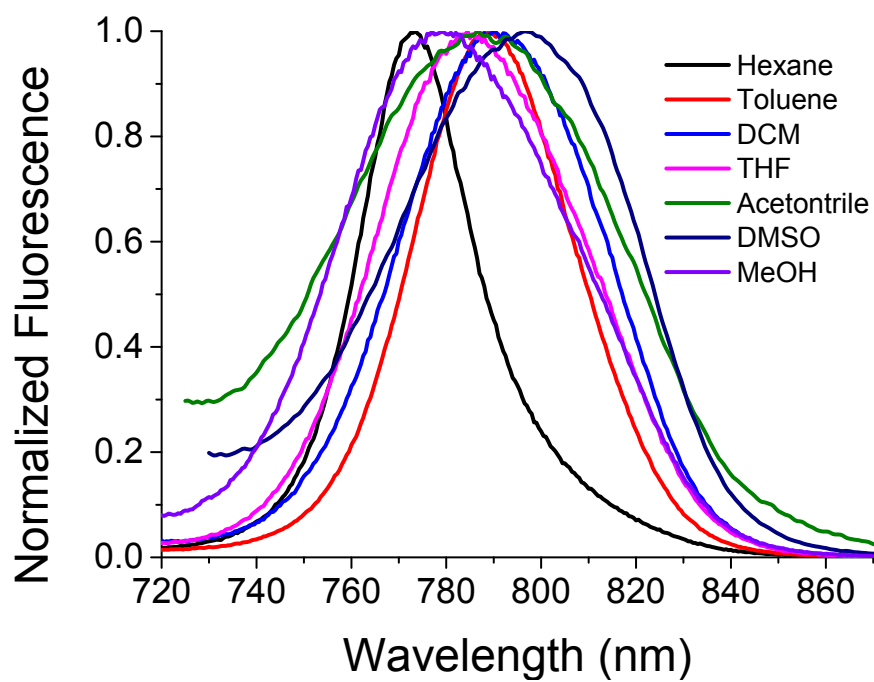

**Figure S7.** Normalized absorption (top) and emission (bottom) spectra of BBP **2b** recorded in different solvents, excited at 527 nm.

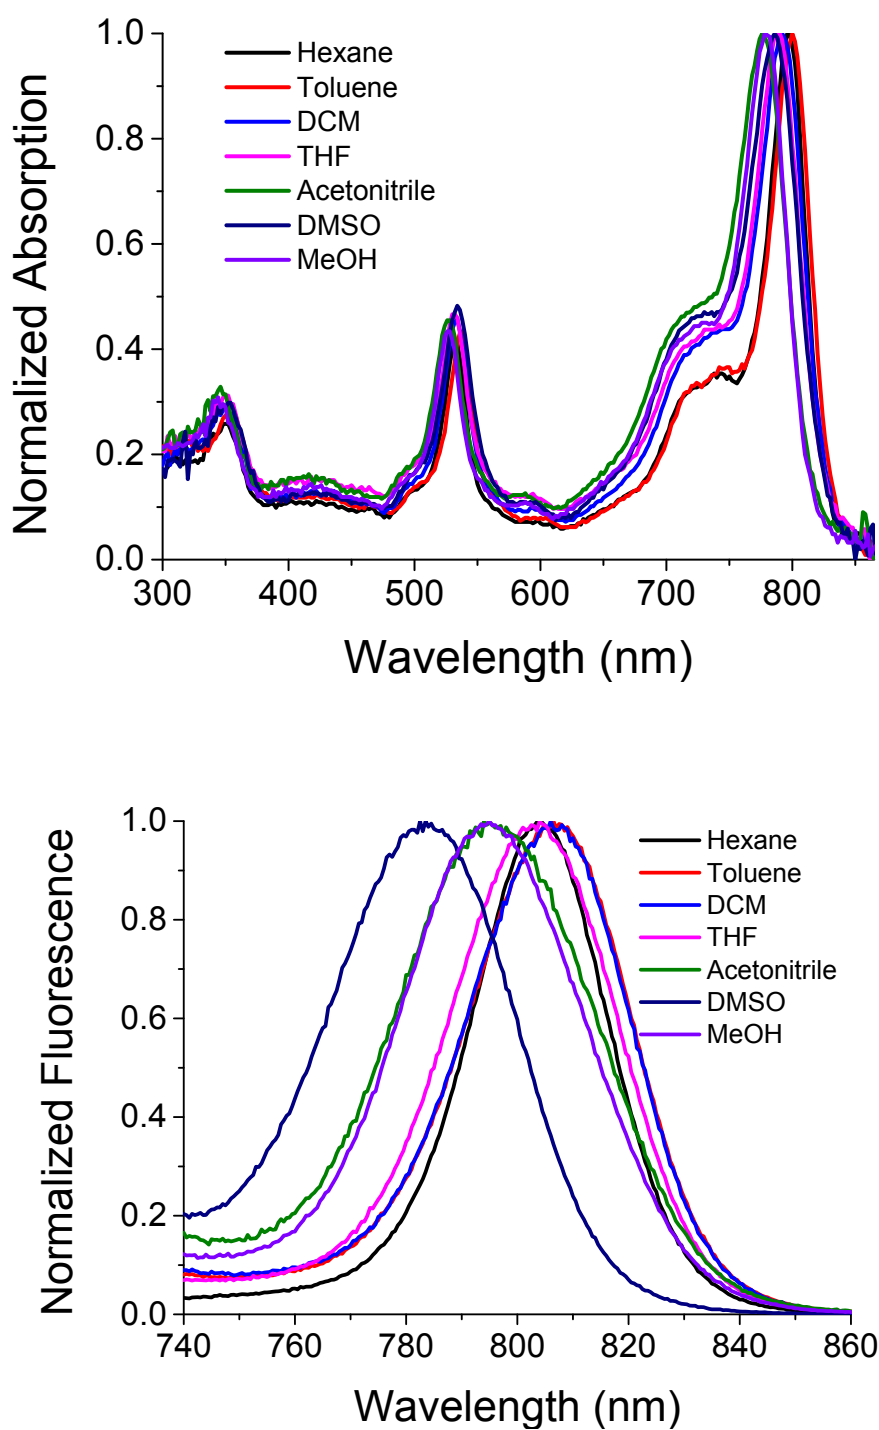

**Figure S8.** Normalized absorption (top) and emission (bottom) spectra of BBP **3a** recorded in different solvents, excited at 530 nm.

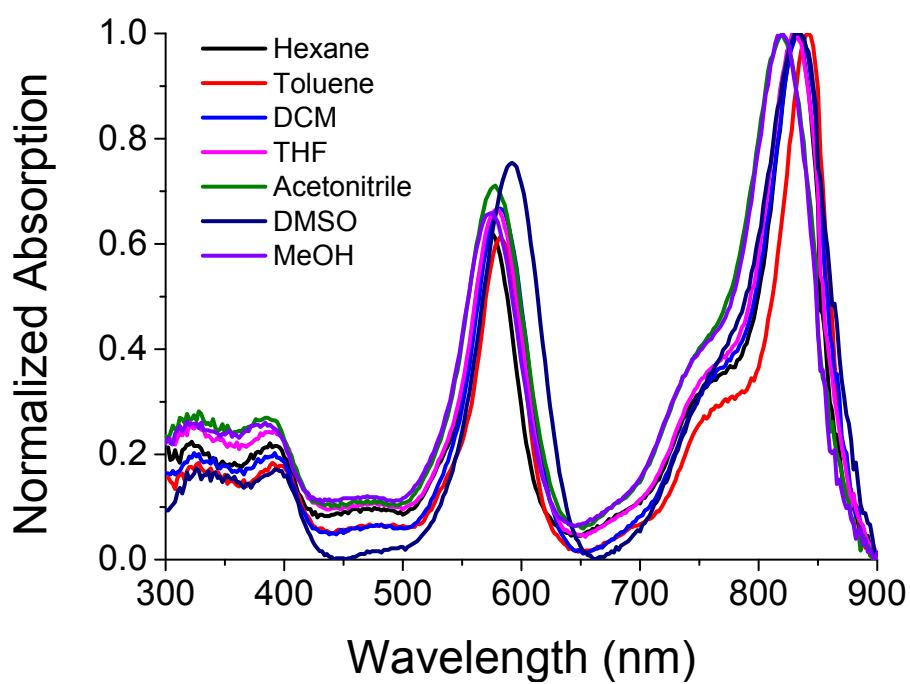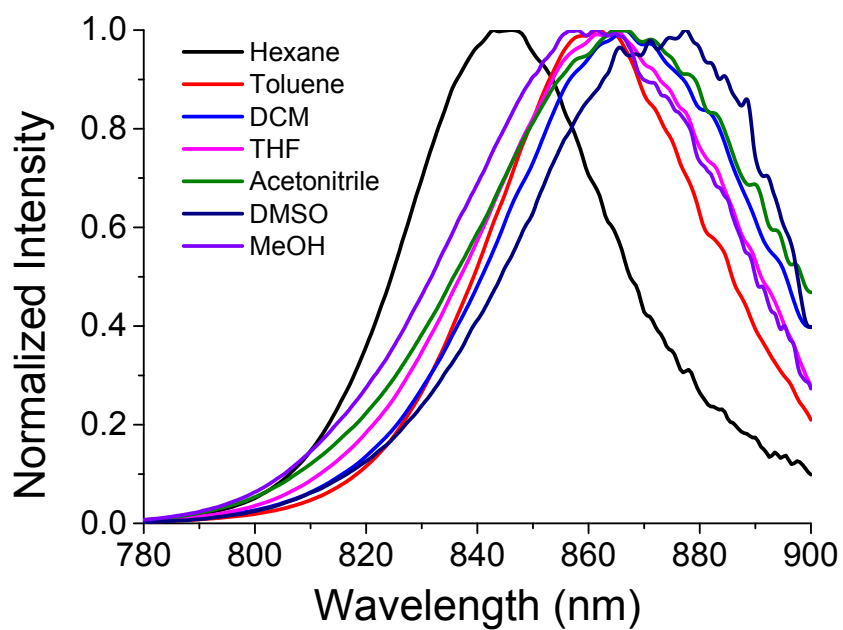

**Figure S9.** Normalized absorption (top) and emission (bottom) spectra of BBP **3b** recorded in different solvents, excited at 565 nm.

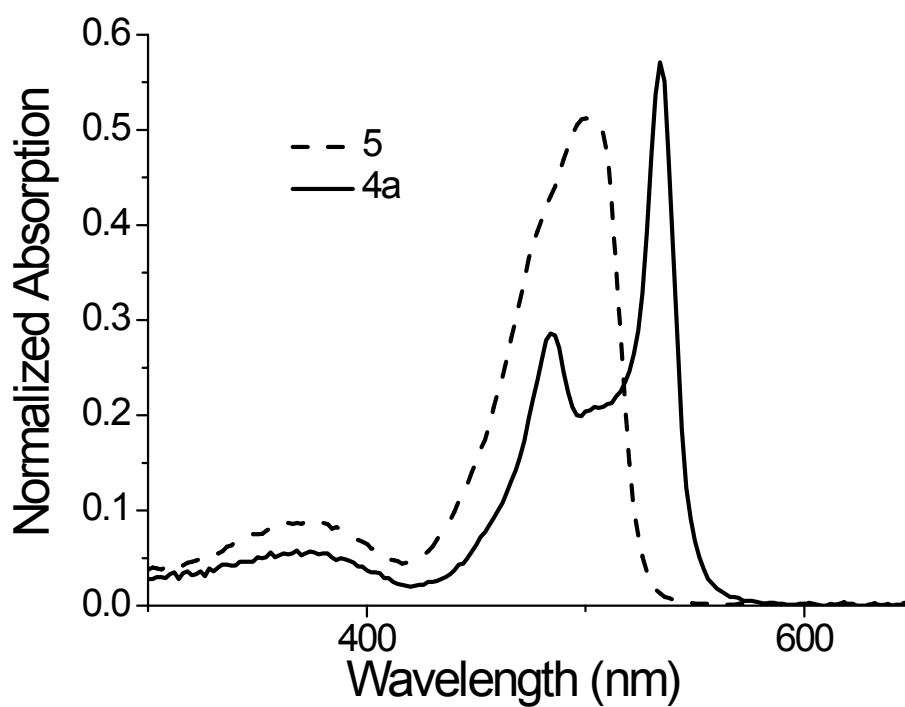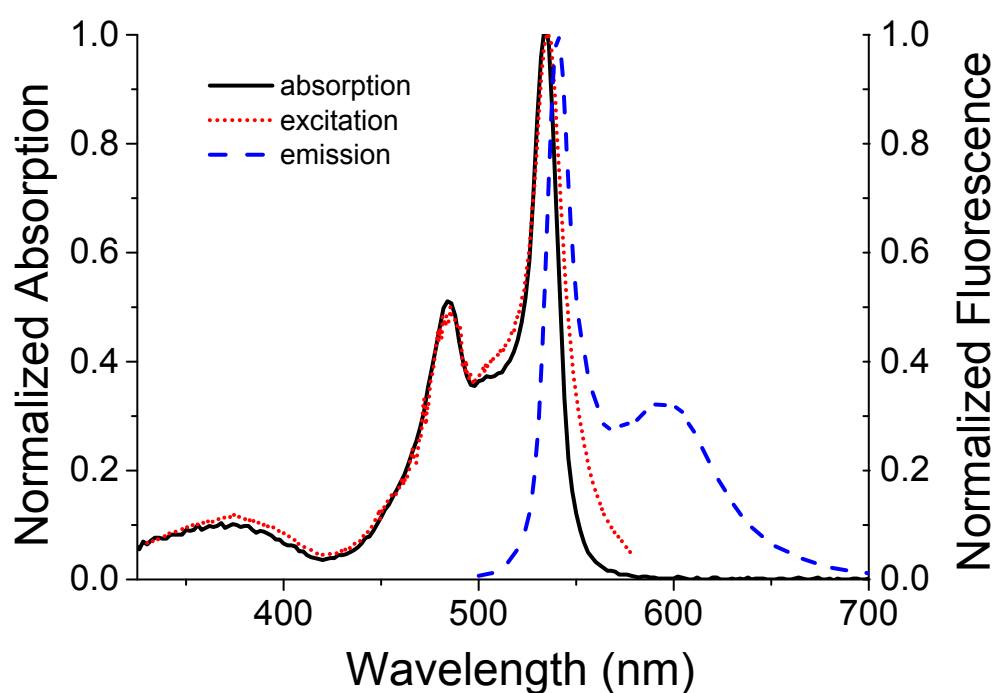

**Figure S10.** (a) UV–Vis spectrum of the novel carbon-bridged bisBODIPY **4** (solid) as compared to that of its monomeric BODIPY **M** (dash) in dichloromethane (top); (b) Normalized UV–vis spectra (solid), excited spectra registered at 600 nm (short dot) and fluorescence spectra excited at 485 nm (dash) of bisBODIPY **4** in dichloromethane (botton).

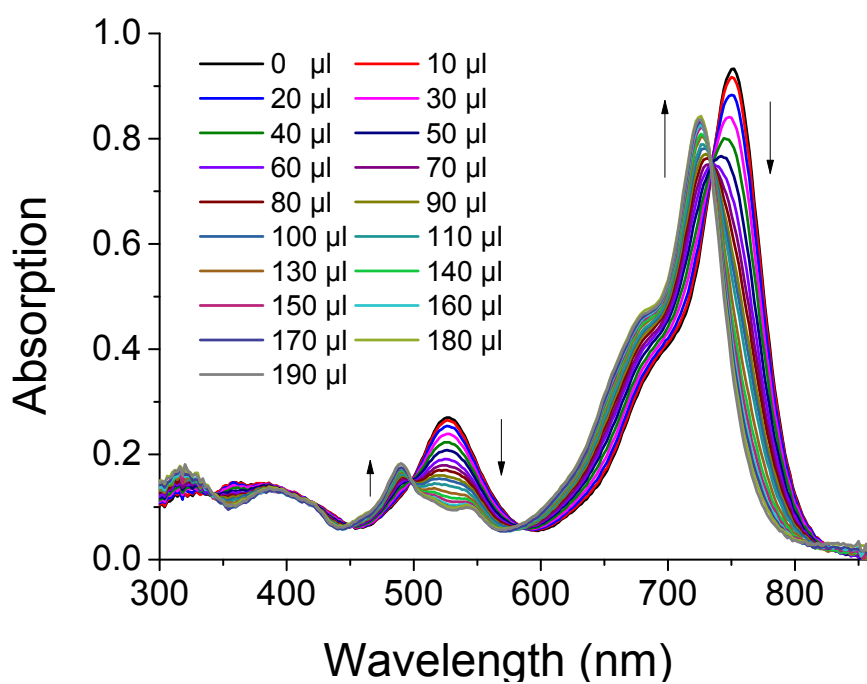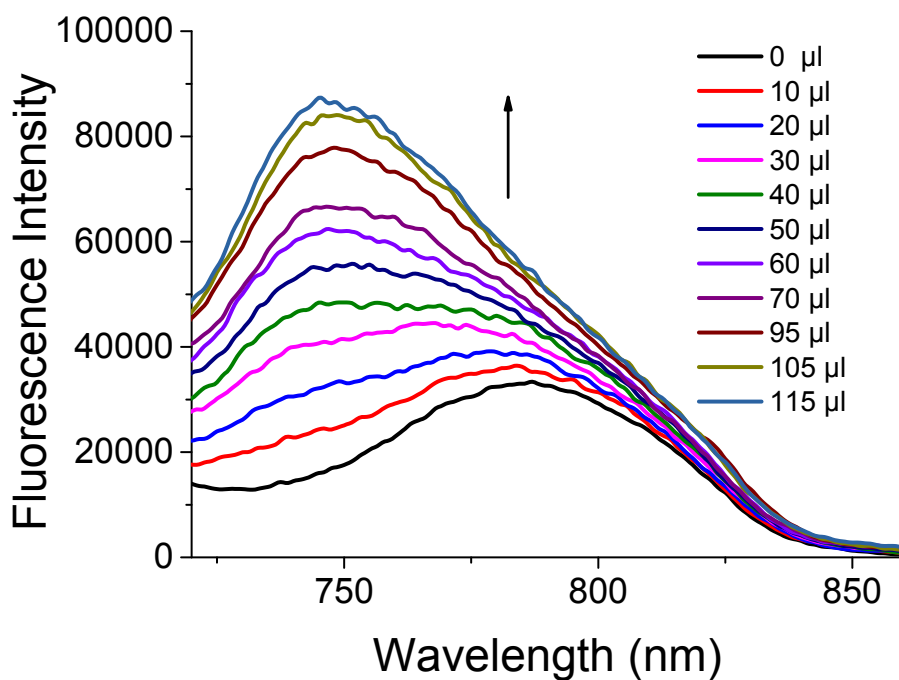

**Figure S11.** (a) Absorbance TFA (TFA: trifluoroacetic acid,  $1.5 \times 10^{-4}$  M) titration spectra of BBP **2b** in acetonitrile ( $1.43 \times 10^{-5}$  M); (b) Fluorescence TFA titration spectra (bottom) of BBP **2b** ( $3.90 \times 10^{-6}$  M) in acetonitrile after adding aliquots of TFA ( $1.5 \times 10^{-4}$  M), excited at 527 nm.

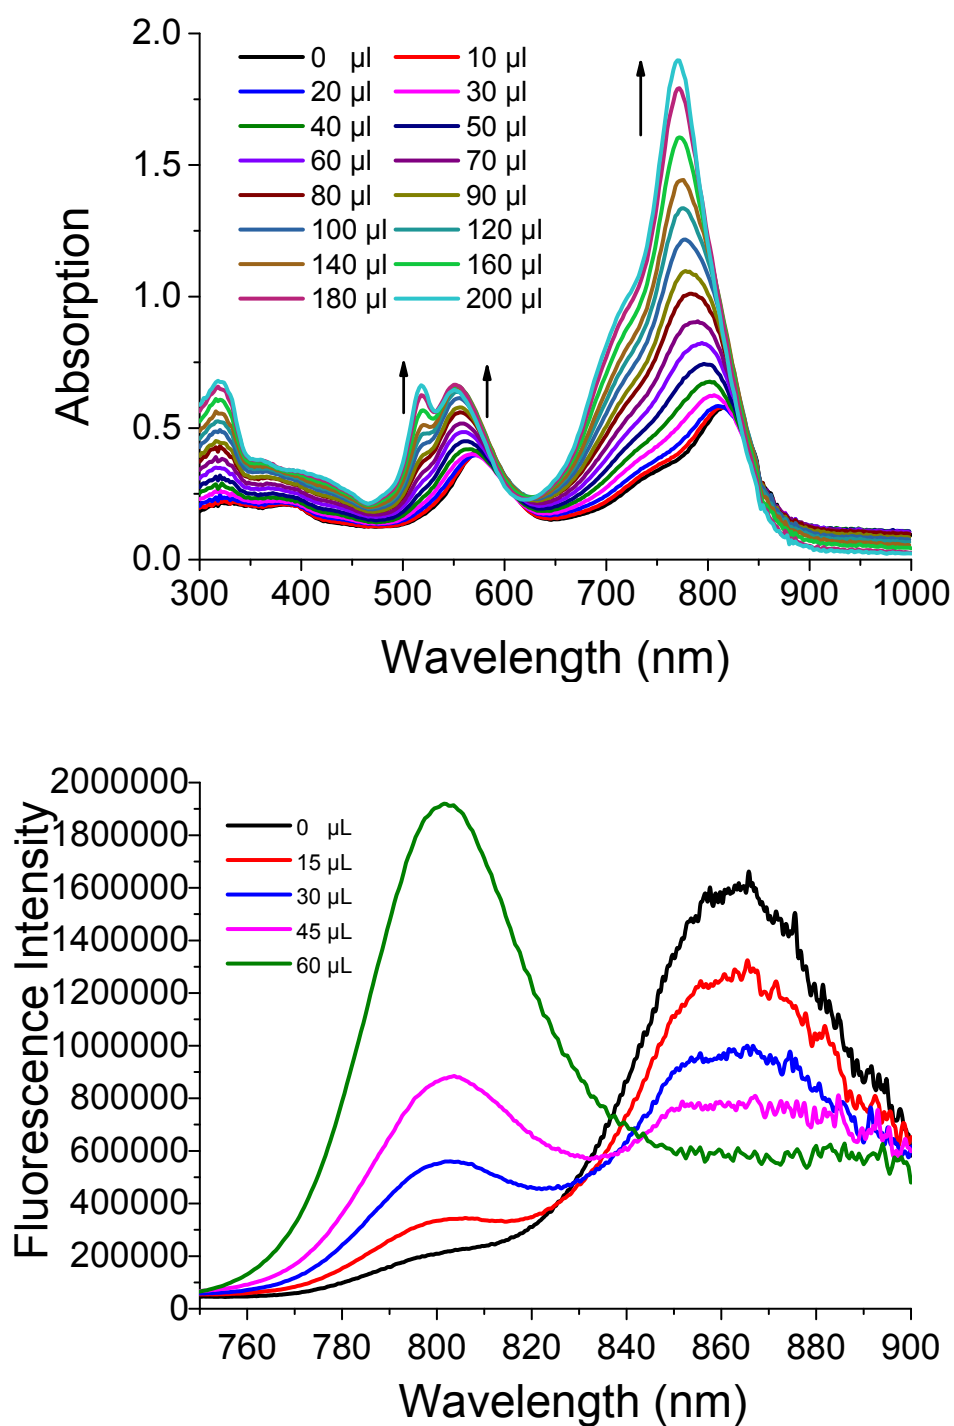

**Figure S12.** (a) Absorbance TFA (TFA: trifluoroacetic acid,  $1.5 \times 10^{-4}$  M) titration spectra of BBP **3b** in acetonitrile ( $8.78 \times 10^{-6}$  M); (b) Fluorescence TFA titration spectra (bottom) of BBP **3b** ( $2.19 \times 10^{-6}$  M) in dichloromethane after adding aliquots of TFA ( $1.5 \times 10^{-4}$  M), excited at 565 nm.



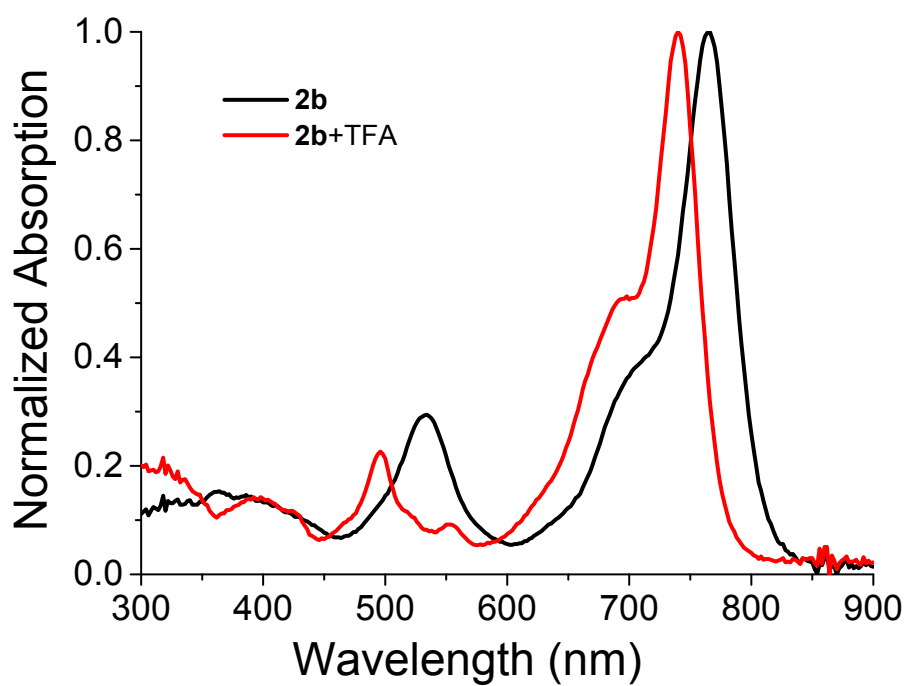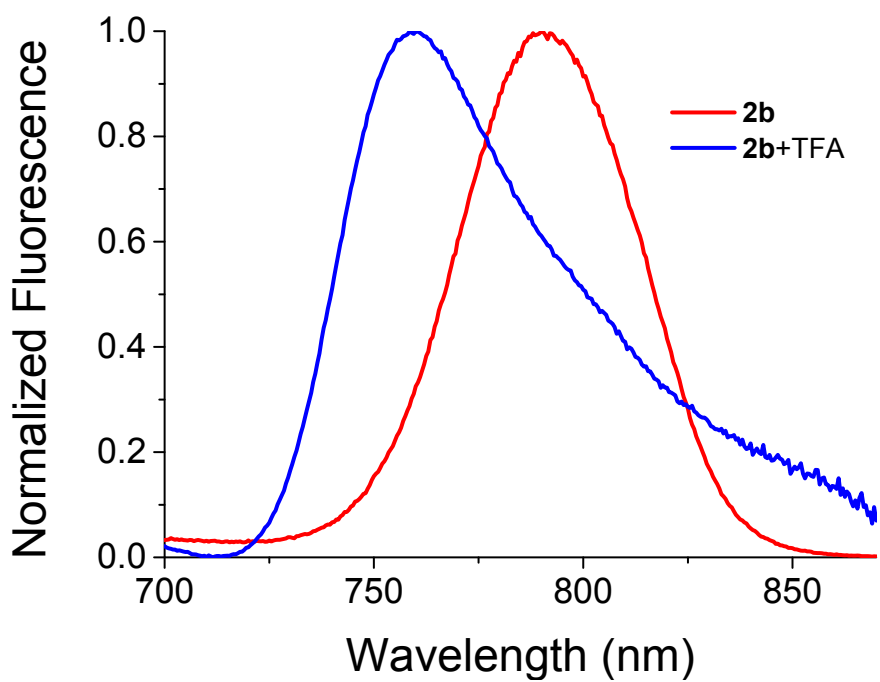

**Figure S13.** Normalized absorption and fluorescence spectra changes of BBP **2b** in dichloromethane after adding TFA. (TFA: trifluoroacetic acid).

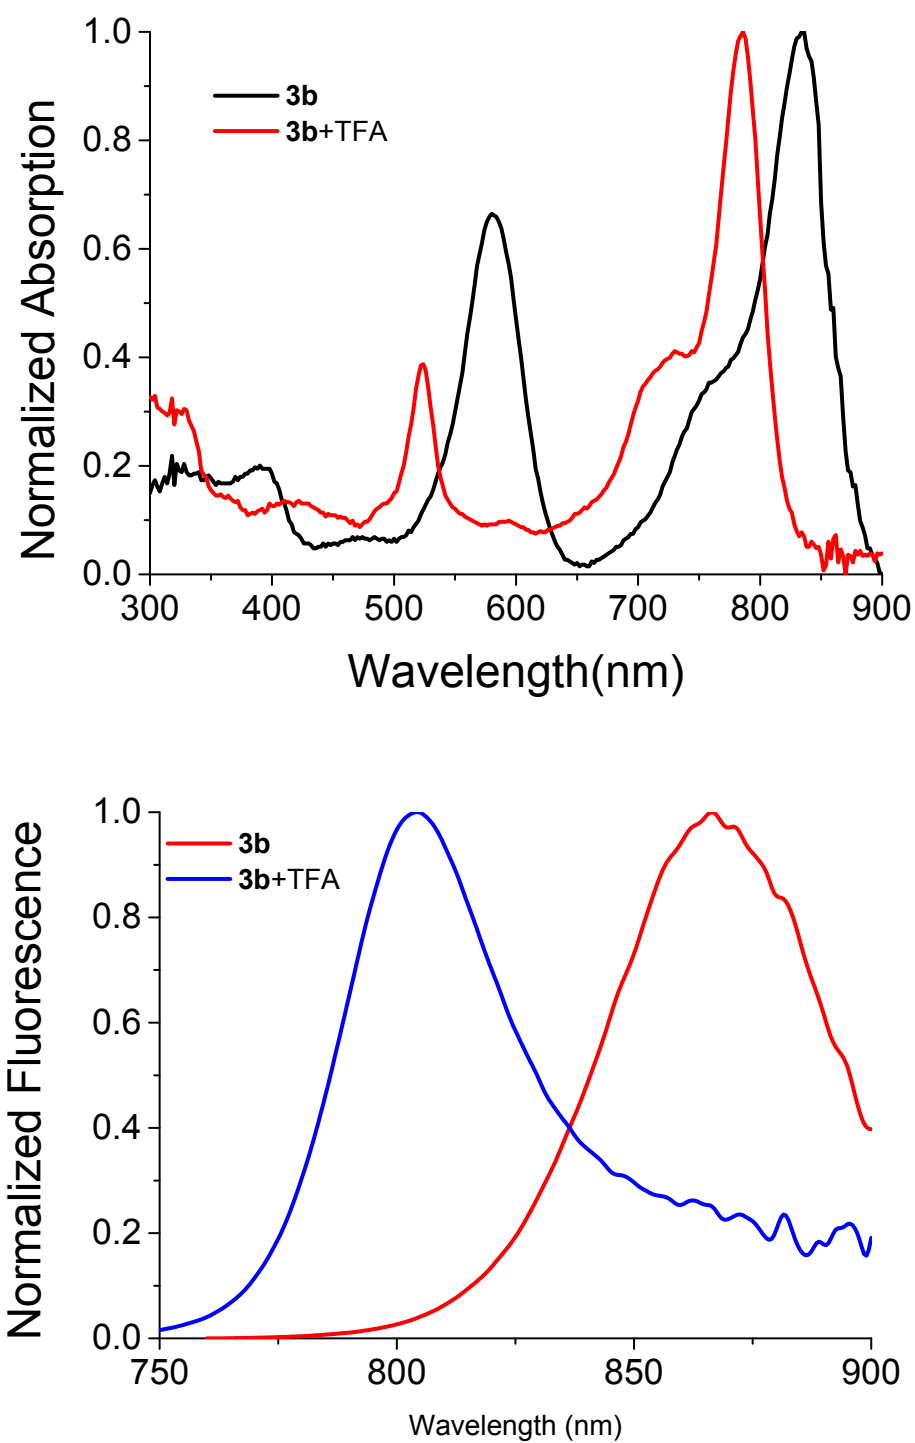

**Figure S14.** Normalized absorption and fluorescence spectra changes of BBP **3b** in dichloromethane after adding TFA. (TFA: trifluoroacetic acid).

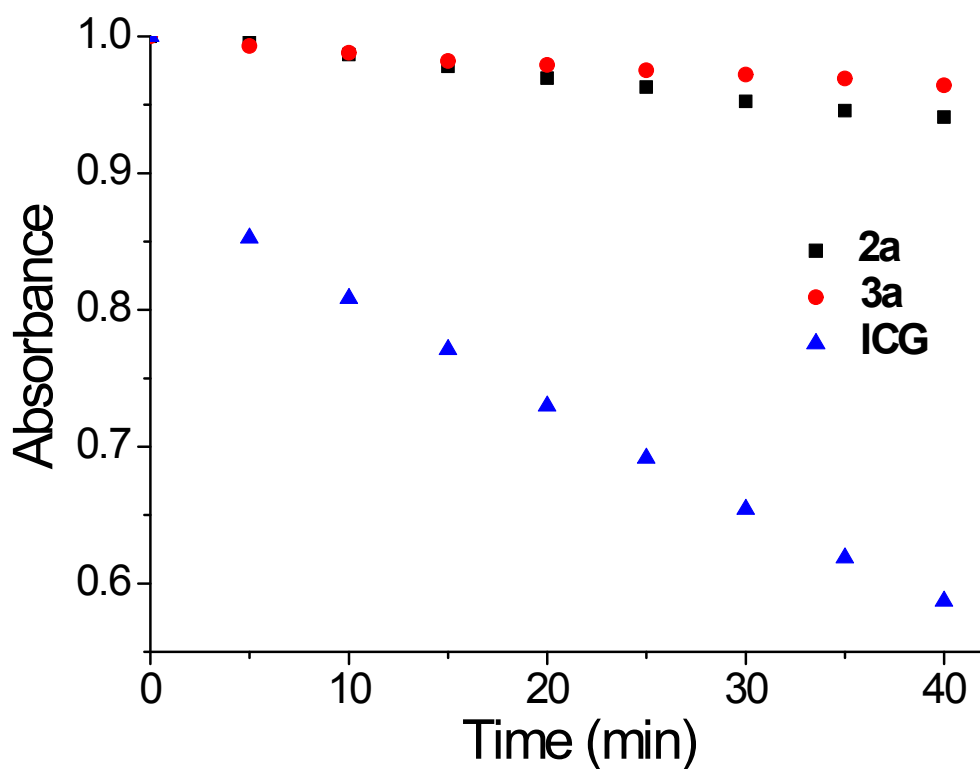

**Figure S15.** Comparison of the photostability of BBPs **2a**, **3a** and **ICG** at the same absorption in DMSO under continuous irradiation with a 500 W Xe lamp over 40 min;  $21 \text{ mW}\cdot\text{cm}^{-2}$ ;  $> 590 \text{ nm}$  light used,  $25^\circ\text{C}$ .

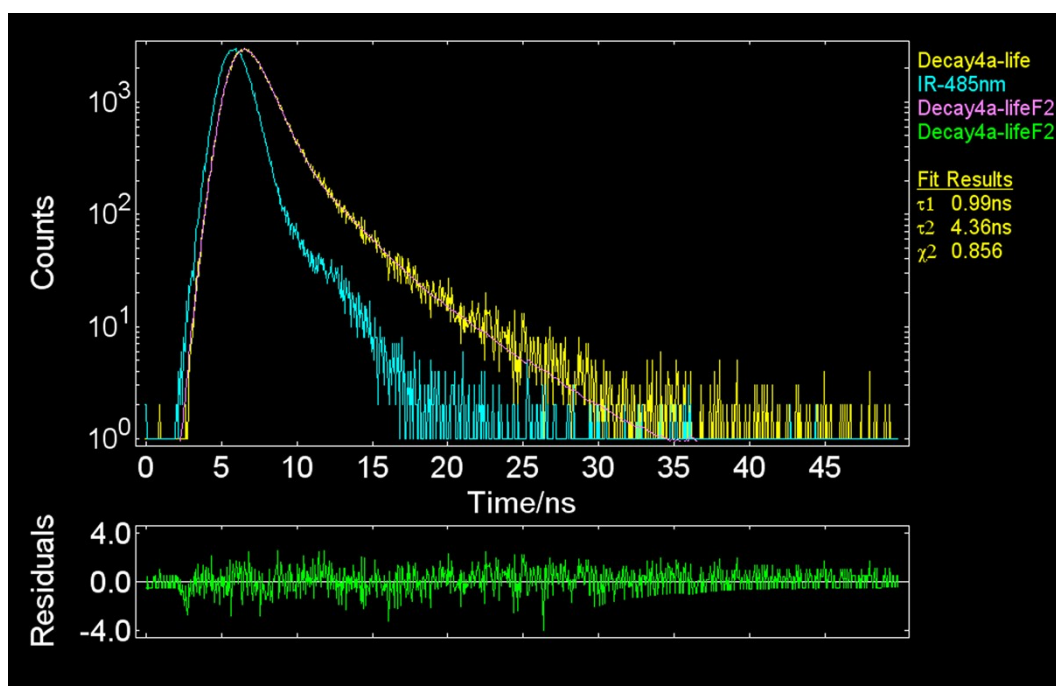

**Figure S16.** The fluorescence decay of **4** in distilled  $\text{CH}_2\text{Cl}_2$  measured by single photon counting method with emission was monitored at  $541 \text{ nm}$ , excited at  $485 \text{ nm}$ .

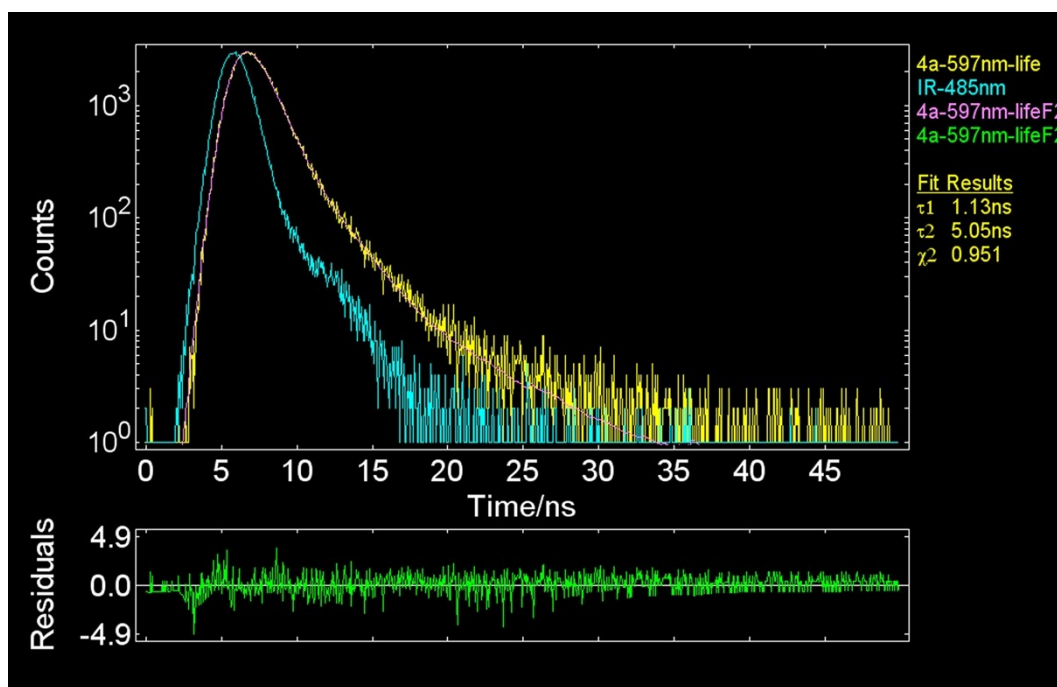

**Figure S17.** The fluorescence decay of **4** in distilled  $\text{CH}_2\text{Cl}_2$  measured by single photon counting method with emission was monitored at 597 nm, excited at 485 nm.

#### 4. Cyclic voltammograms of BODIPY M, BBPs 1-3 and bisBODIPY 4

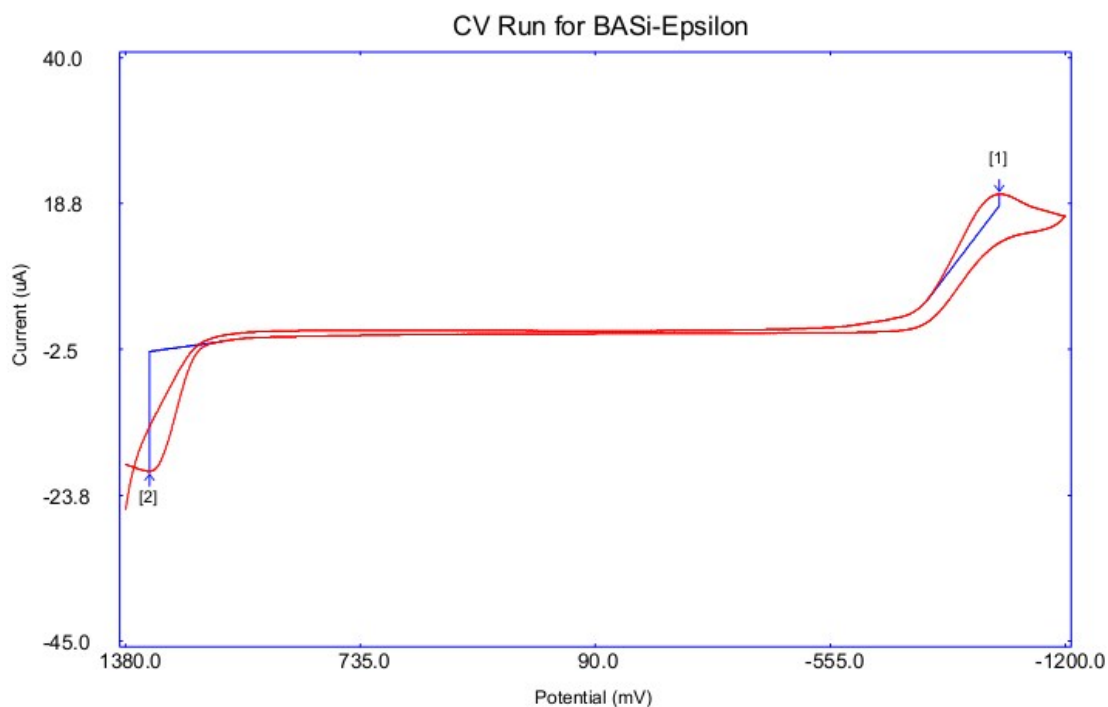

**Figure S18.** Cyclic voltammogram of BODIPY M in dichloromethane and scanning rate of  $20 \text{ mV s}^{-1}$

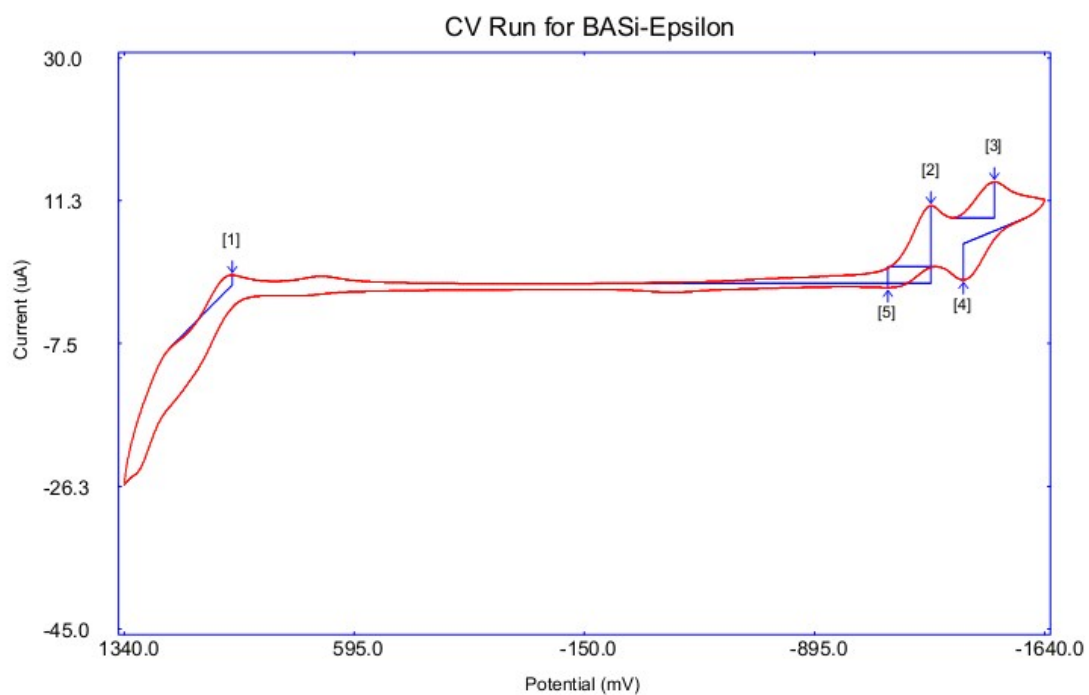

**Figure S19.** Cyclic voltammogram of bisBODIPY **4** in dichloromethane and scanning rate of  $20 \text{ mV s}^{-1}$

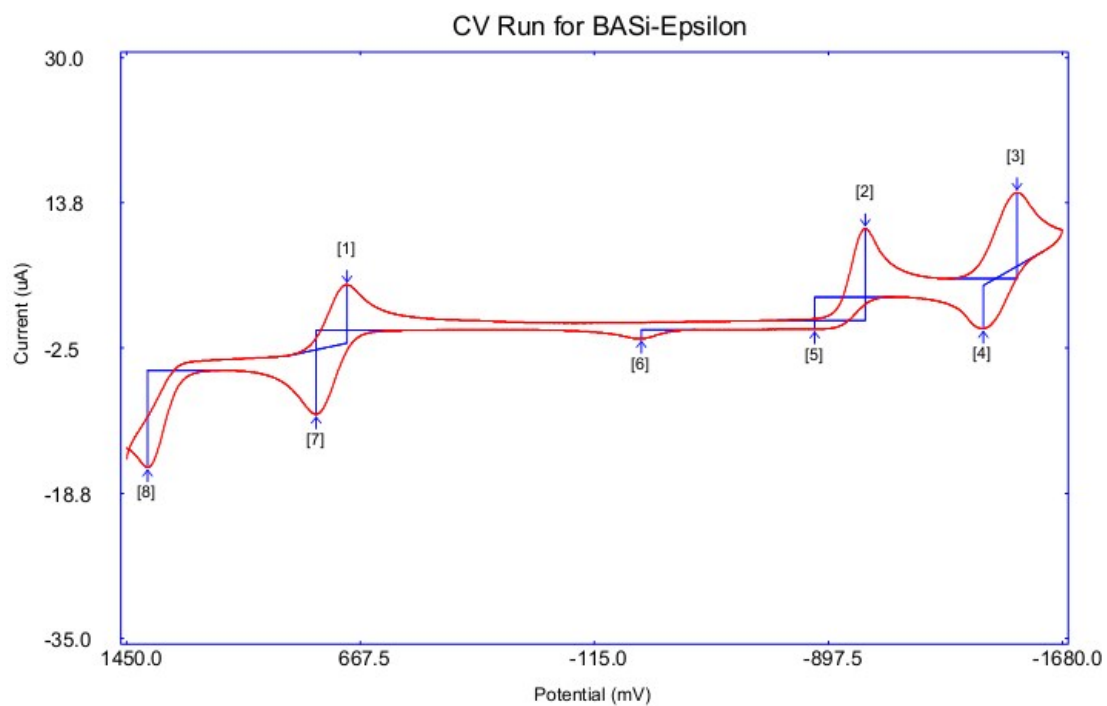

**Figure S20.** Cyclic voltammogram of BBP **1** in dichloromethane and scanning rate of  $20 \text{ mV s}^{-1}$

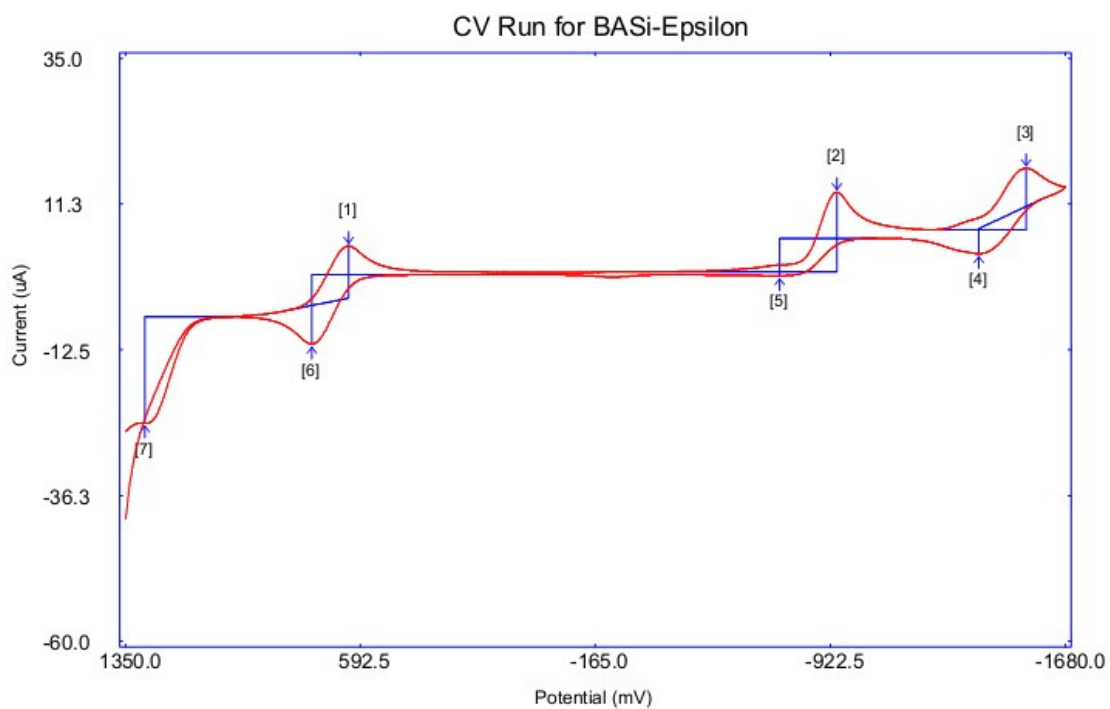

**Figure S21.** Cyclic voltammogram of BBP **2** in dichloromethane and scanning rate of  $20 \text{ mV s}^{-1}$

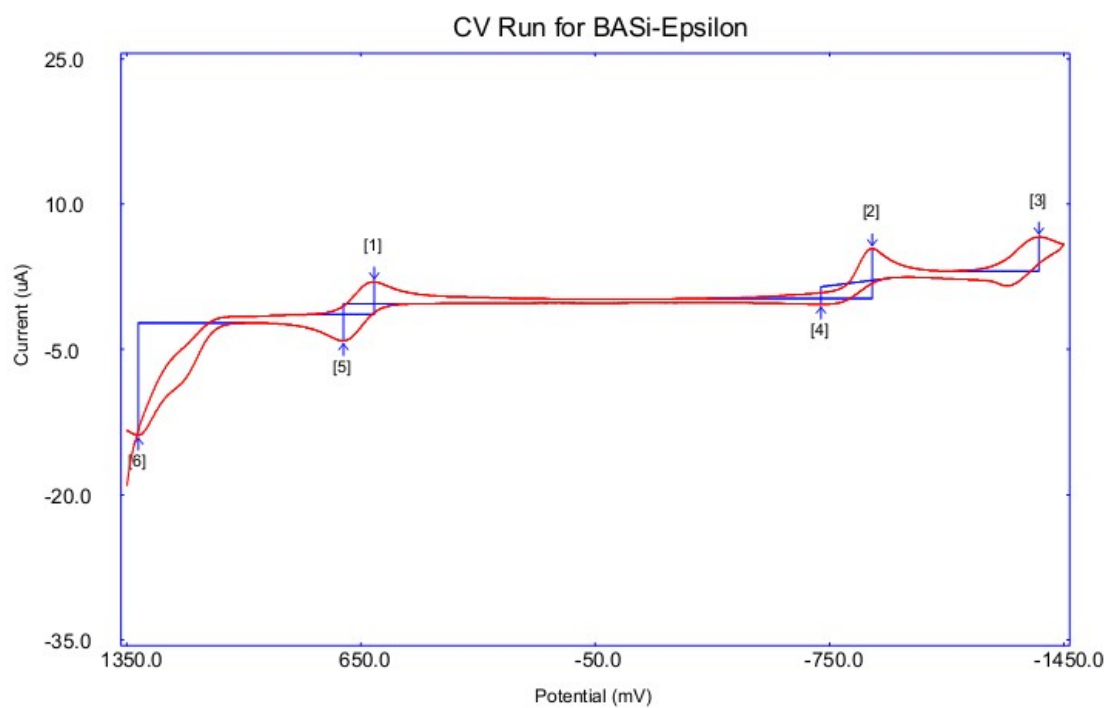

**Figure S22.** Cyclic voltammogram of BBP **3** in dichloromethane and scanning rate of  $20 \text{ mV s}^{-1}$

## 5. Experiment Section

5,5-dimethyl-1,9-diformyldipyrromethane **5** were synthesized according to a reported literature<sup>4</sup>. POCl<sub>3</sub> (0.93 mL, 12 mmol) was added dropwise to DMF (1.1 mL, 12 mmol) at 0 °C. The mixture was warmed to room temperature and stirred for 30 min. The ice bath was replaced to cool the mixture back to 0 °C, then 20 mL of CH<sub>2</sub>Cl<sub>2</sub> was added to the mixture. A solution of dipyrrolmethane (870 mg, 5 mmol) in 50 mL of CH<sub>2</sub>Cl<sub>2</sub> was added dropwise over 5 min at 0 °C, the temperature was warmed to room temperature and continued to stir for 4 h. The reaction medium was poured into aqueous Na<sub>2</sub>CO<sub>3</sub> slowly. The reaction mixture was further stirred for 6 h, and washed with water. The organic layers were combined, dried over anhydrous Na<sub>2</sub>SO<sub>4</sub>, and evaporated in vacuo. The crude product was purified by chromatography (silica gel, petroleum ether and ethyl acetate) to afford a light yellow solid, affording the yield of 56% (644 mg). <sup>1</sup>H NMR (300 MHz, *d*<sub>6</sub>-DMSO) δ 11.85 (br, s, 2H), 9.39 (s, 2H), 6.89 (s, 2H), 6.11 (s, 2H), 2.29 (s, 4H), 1.42 (s, 6H). <sup>13</sup>C NMR (75 MHz, *d*<sub>6</sub>-DMSO) δ 179.2, 148.0, 133.2, 121.2, 108.2, 36.2, 27.7.

**Syntheses of bisBODIPY 4:** To compound **5** (230 mg, 1 mmol) in 100 mL toluene and 10 mL ethyl acetate was added distilled 3-ethyl-2,4-dimethylpyrrole (333 μL, 2.5 mmol) in 1 mL CH<sub>2</sub>Cl<sub>2</sub> and POCl<sub>3</sub> (94 μL, 1 mmol) in 1 mL CH<sub>2</sub>Cl<sub>2</sub> at ice-cold condition under argon. The reaction mixture was stirred at room temperature for 30 min. After 2 mL Et<sub>3</sub>N was added into the reaction mixture, the mixture was stirred for 10 min, 4 mL BF<sub>3</sub>·OEt<sub>2</sub> was then added. The reaction mixture was left refluxing for 30 min, poured into water and extracted with ethyl acetate. Organic layers were combined, and solvent was removed under vacuum. The crude product was purified from chromatograph (silica gel, CH<sub>2</sub>Cl<sub>2</sub>) to give the desired compound **4** as red powder in 46% yield (246 mg). <sup>1</sup>H NMR (300 MHz, CDCl<sub>3</sub>) δ 7.01 (s, 2H), 6.86 (d, *J* = 3.9 Hz, 2H), 6.42 (d, *J* = 3.9 Hz, 2H), 2.41 (s, 6H), 2.30 (q, *J* = 7.5 Hz, 4H), 2.11 (s, 6H), 2.00 (s, 6H), 0.98 (t, *J* = 7.5 Hz, 6H). <sup>13</sup>C NMR (75 MHz, CDCl<sub>3</sub>) δ 163.7, 159.4, 138.1, 134.8, 134.1, 133.6, 126.8, 123.1, 116.7, 40.3, 30.2, 17.2, 14.4, 13.1, 9.3. HRMS (APCI) Calcd. for C<sub>29</sub>H<sub>34</sub>N<sub>4</sub>B<sub>2</sub>F<sub>4</sub> [M + H]<sup>+</sup>: 537.2969, found 537.2970.

**Syntheses of BBP 1:** To **4** (53.6 mg, 0.1 mmol) in 50 mL of dry dichloromethane was dropwisely added FeCl<sub>3</sub> (162 mg, 1 mmol, 10 eq) in 5 mL of CH<sub>3</sub>NO<sub>2</sub>. The reaction mixture

was stirred at room temperature for 5 min, and was quenched by adding saturated aqueous solution of NaHCO<sub>3</sub>. The reaction mixture was diluted with dichloromethane, washed with water, dried over anhydrous Na<sub>2</sub>SO<sub>4</sub>, and evaporated under vacuum. The residue was purified by column chromatography on silica gel with CH<sub>2</sub>Cl<sub>2</sub>/petroleum ether as eluent to give the desired compound **1** in 70% isolated yield (37 mg). <sup>1</sup>H NMR (300 MHz, CDCl<sub>3</sub>) δ 6.97 (s, 2H), 6.60 (s, 2H), 2.56 (s, 6H), 2.40 (q, *J* = 7.5 Hz, 4H), 2.14 (s, 6H), 1.94 (s, 6H), 1.07 (t, *J* = 7.5 Hz, 6H); <sup>13</sup>C NMR (125 MHz, CDCl<sub>3</sub>) δ 163.6, 143.1, 141.8, 137.4, 137.2, 135.6, 133.7, 124.6, 124.2, 35.2, 32.2, 18.6, 15.5, 14.5, 10.7. HRMS (APCI) Calcd. for C<sub>29</sub>H<sub>33</sub>N<sub>4</sub>B<sub>2</sub>F<sub>4</sub> [M + H]<sup>+</sup>: 535.2827, found 535.2768.

**Syntheses of BBP 2a:** To compound tert-butyl-2-(4-formylphenoxy)acetate (38 mg, 0.16 mmol) and **1** (82 mg, 0.15 mmol) in 50 ml chlorotoluene were added piperidine (1 ml) through syringe, and a crystal of p-TsOH. The solution was refluxed over its boiling point up to 160°C for 2 hours in a round-bottomed flask and any water formed during the reaction was removed by using a Soxhlet extractor containing anhydrous CaCl<sub>2</sub>. Reaction was monitored by TLC. The resulting mixture was cooled to room temperature, poured into water and extracted with CH<sub>2</sub>Cl<sub>2</sub>. Organic layers were combined, and solvent was removed under vacuum. The crude product was purified from chromatograph (silica gel, petroleum/CH<sub>2</sub>Cl<sub>2</sub> = 1/1, v/v) and then recrystallized from CH<sub>3</sub>OH, affording the desired compound **2a** (35 mg) in 31% yield. <sup>1</sup>H NMR (300 MHz, CDCl<sub>3</sub>) δ 7.59–7.54 (m, 3H), 7.33–7.26 (d, *J* = 20.4 Hz, 1H), 6.96–6.91 (m, 4H), 6.56 (d, *J* = 3.6 Hz, 2H), 4.57 (s, 2H), 2.68 (q, *J* = 7.2 Hz, 2H), 2.57 (s, 3H), 2.40 (q, *J* = 7.5 Hz, 2H), 2.12–2.11 (m, 6H), 1.97 (s, 6H), 1.26 (s, 9H), 1.08 (t, *J* = 7.5 Hz, 3H), 0.85 (t, *J* = 7.2 Hz, 3H); <sup>13</sup>C NMR (125 MHz, CDCl<sub>3</sub>) δ 175.6, 174.5, 167.8, 158.8, 158.2, 152.5, 139.6, 138.4, 138.3, 138.1, 136.5, 135.1, 134.3, 133.1, 130.8, 129.0, 128.3, 127.3, 122.5, 121.1, 117.8, 115.0, 114.2, 113.6, 82.6, 65.8, 44.6, 29.7, 28.1, 23.7, 18.7, 17.3, 14.4, 13.9, 12.9, 9.4, 9.1. HRMS (APCI) Calcd. for C<sub>42</sub>H<sub>47</sub>N<sub>4</sub>B<sub>2</sub>F<sub>4</sub>O<sub>3</sub> [M + H]<sup>+</sup>: 753.3770, found 753.3767.

**Syntheses of BBP 2b:** Prepared using the above procedure from compound **1** (82 mg, 0.15 mmol) and 4-N,N-dimethylbenzaldehyde (24 mg, 0.16 mmol) affording gray power **2b** (34 mg) in 34% yield. <sup>1</sup>H NMR (300 MHz, CDCl<sub>3</sub>) δ 7.56–7.51 (m, 3H), 7.36 (d, *J* = 17.1 Hz,



1H), 6.99 (s, 1H), 6.93 (s, 1H), 6.75–6.70 (m, 2H), 6.59 (d,  $J = 8.7$  Hz, 2H), 3.05 (s, 6H), 2.71 (q,  $J = 7.5$  Hz, 2H), 2.56 (s, 3H), 2.41 (q,  $J = 7.5$  Hz, 2H), 2.18–2.17 (m, 6H), 1.97 (s, 6H), 1.23 (t,  $J = 7.5$  Hz, 3H), 1.08 (t,  $J = 7.5$  Hz, 3H). HRMS (APCI) Calcd. for  $C_{38}H_{42}N_5B_2F_4$  [ $M + H$ ]<sup>+</sup>: 666.3562, found 666.3553.

**Syntheses of BBP 3a:** To compound tert-butyl-2-(4-formylphenoxy)acetate (143 mg, 0.6 mmol) and **1** (82 mg, 0.15 mmol) in 50 ml chlorotoluene were added piperidine (1 ml) through syringe, and a crystal of p-TsOH. The solution was refluxed over its boiling point up to 160°C for 30 min in a round-bottomed flask and any water formed during the reaction was removed by using a Soxhlet extractor containing anhydrous  $CaCl_2$ . Reaction was monitored by TLC. The resulting mixture was cooled to room temperature, poured into water and extracted with  $CH_2Cl_2$ . Organic layers were combined, and solvent was removed under vacuum. The crude product was purified from chromatograph (silica gel, petroleum/ $CH_2Cl_2 = 1/1$ , v/v) and then recrystallized from  $CH_3OH$ , affording the desired compound **3a** (33 mg) in 23% yield. <sup>1</sup>H NMR (300 MHz,  $CDCl_3$ )  $\delta$  7.60–7.55 (m, 6H), 7.32 (d,  $J = 16.8$  Hz, 2H), 6.97–6.93 (m, 6H), 6.62 (s, 2H), 4.58 (s, 4H), 2.70 (q,  $J = 7.5$  Hz, 4H), 2.17 (s, 6H), 2.00 (s, 6H), 1.23 (t,  $J = 7.5$  Hz, 6H). <sup>13</sup>C NMR (125 MHz,  $CDCl_3$ )  $\delta$  175.7, 167.8, 158.9, 153.0, 139.6, 138.3, 136.8, 135.4, 133.4, 130.8, 129.0, 128.1, 121.1, 117.8, 115.0, 113.6, 82.6, 65.8, 44.8, 29.7, 28.1, 23.7, 18.7, 13.9, 9.2. HRMS (APCI) Calcd. for  $C_{55}H_{61}N_4B_2F_4O_6$  [ $M + H$ ]<sup>+</sup>: 971.4713, found 971.4697.

**Syntheses of BBP 3b:** Prepared using the above procedure from compound **1** (82 mg, 0.15 mmol) and 4-N,N-dimethylbenzaldehyde (90 mg, 0.6 mmol) affording **3b** (31 mg) in 26% yield. <sup>1</sup>H NMR (300 MHz,  $CDCl_3$ )  $\delta$  7.56–7.51 (m, 6H), 7.35 (d,  $J = 17.4$  Hz, 2H), 6.94 (s, 2H), 6.74 (d,  $J = 8.4$  Hz, 4H), 6.58 (s, 2H), 3.05 (s, 12H), 2.71 (d,  $J = 7.2$  Hz, 4H), 2.19 (s, 6H), 2.00 (s, 6H), 1.23 (t,  $J = 7.2$  Hz, 6H). HRMS (APCI) Calcd. for  $C_{47}H_{51}N_6B_2F_4$  [ $M + H$ ]<sup>+</sup>: 797.4297, found 797.4285.

## 6. $^1\text{H}$ NMR and $^{13}\text{C}$ NMR spectra for all the compounds

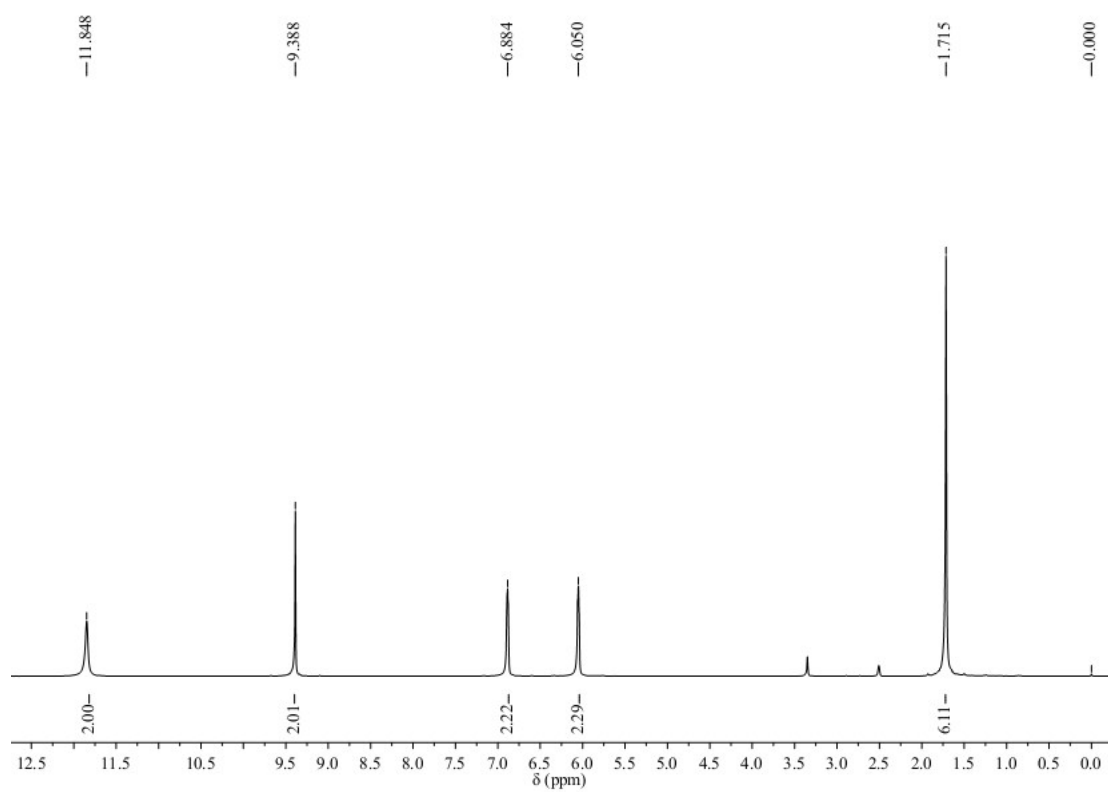

$^1\text{H}$  NMR spectrum of **5** in  $d_6$ -DMSO solution

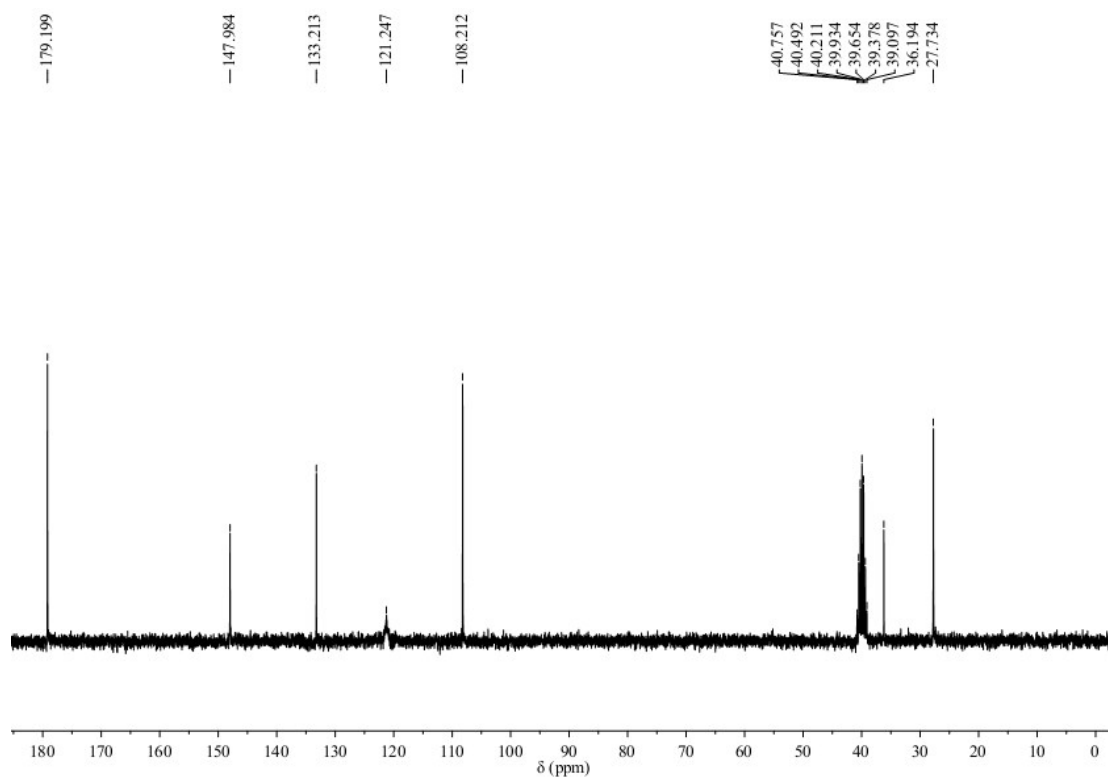

$^{13}\text{C}$  NMR spectrum of **5** in  $d_6$ -DMSO solution

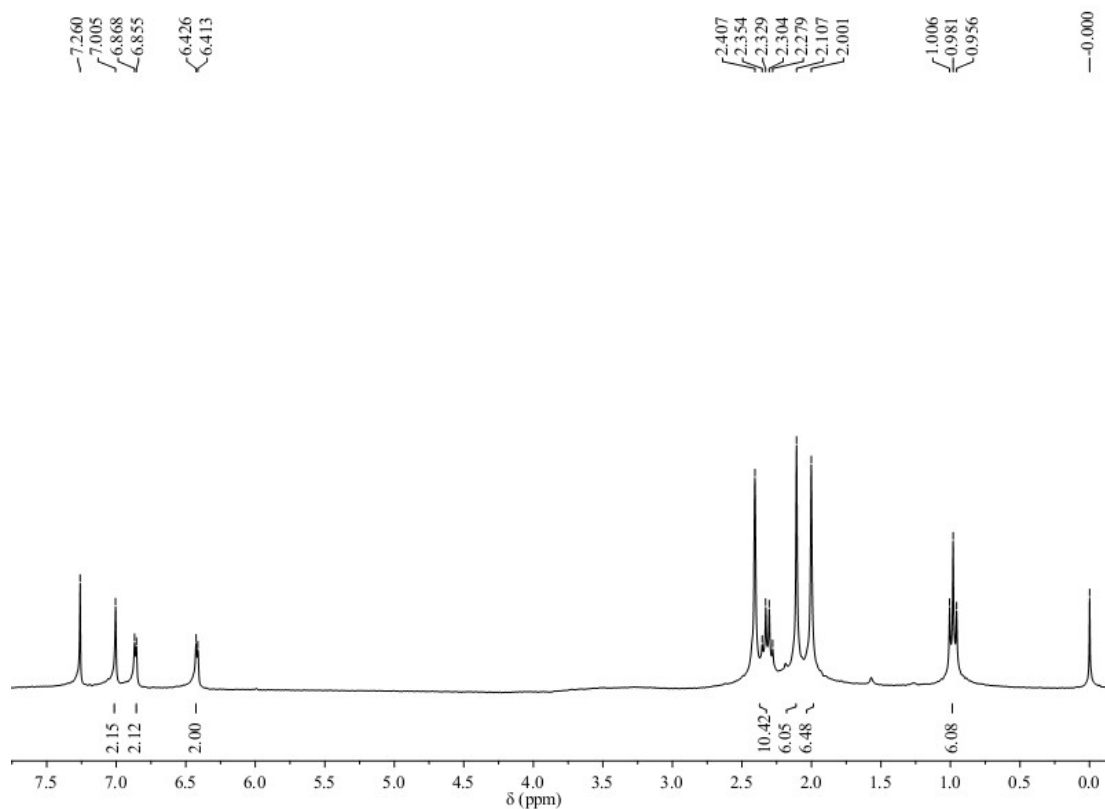

$^1\text{H}$  NMR spectrum of bisBODIPY **4** in  $\text{CDCl}_3$  solution

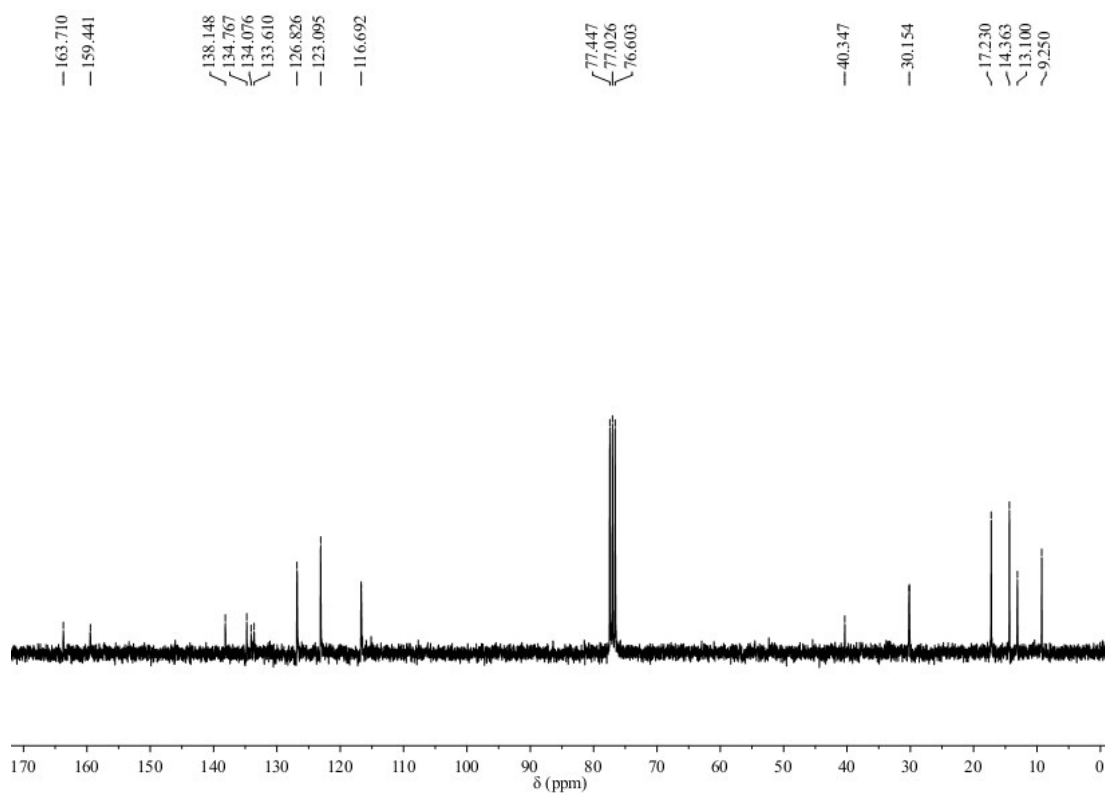

$^{13}\text{C}$  NMR spectrum of bisBODIPY **4** in  $\text{CDCl}_3$  solution

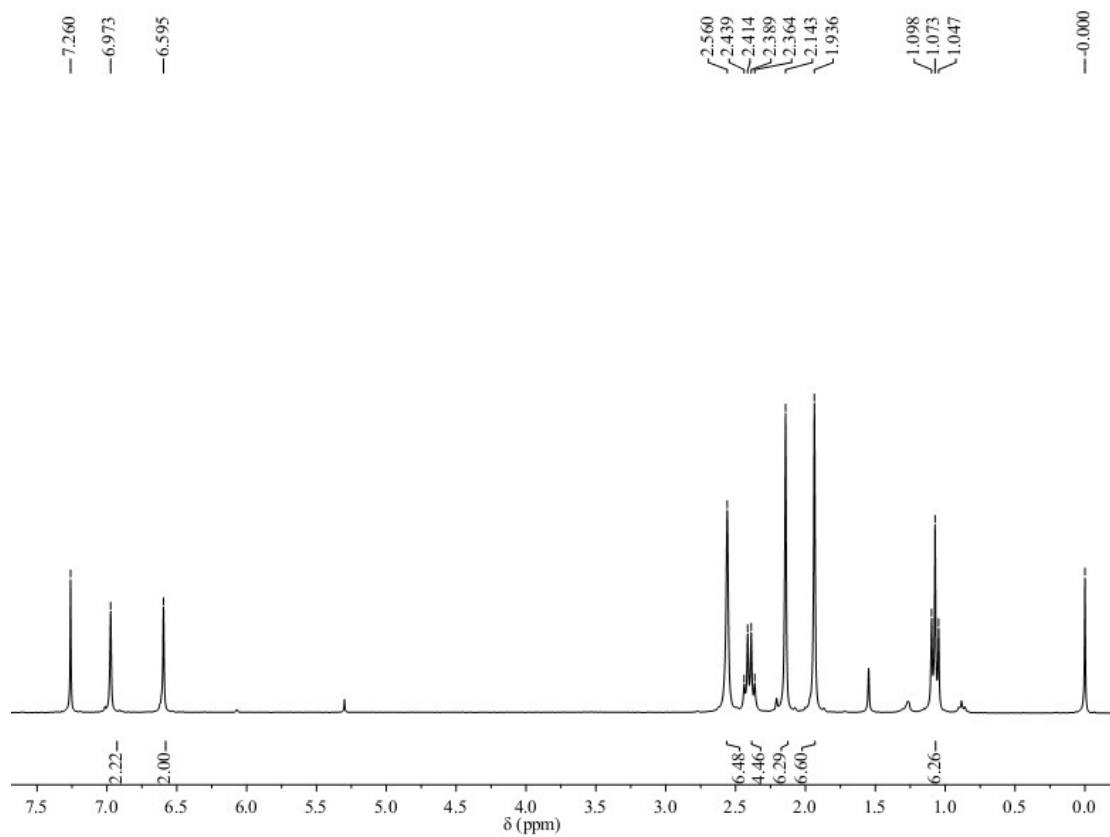

$^1\text{H}$  NMR spectrum of BBP **1** in  $\text{CDCl}_3$  solution

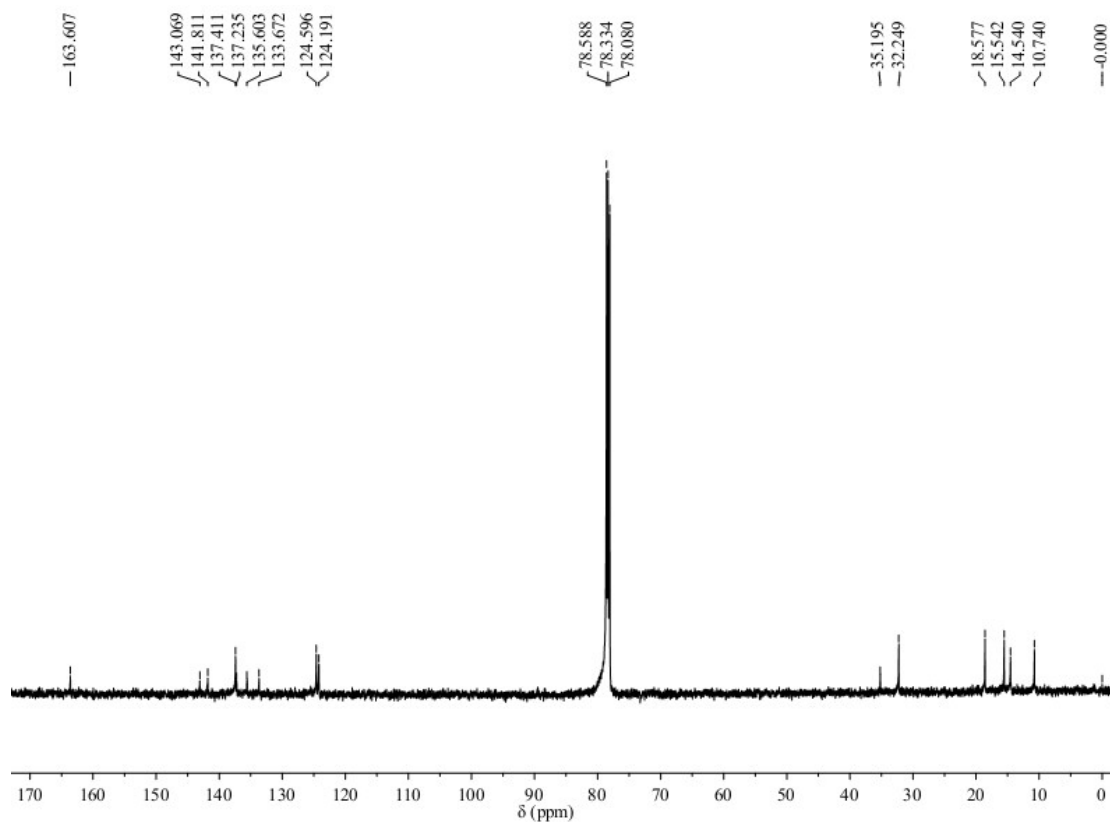

$^{13}\text{C}$  NMR spectrum of BBP **1** in  $\text{CDCl}_3$  solution

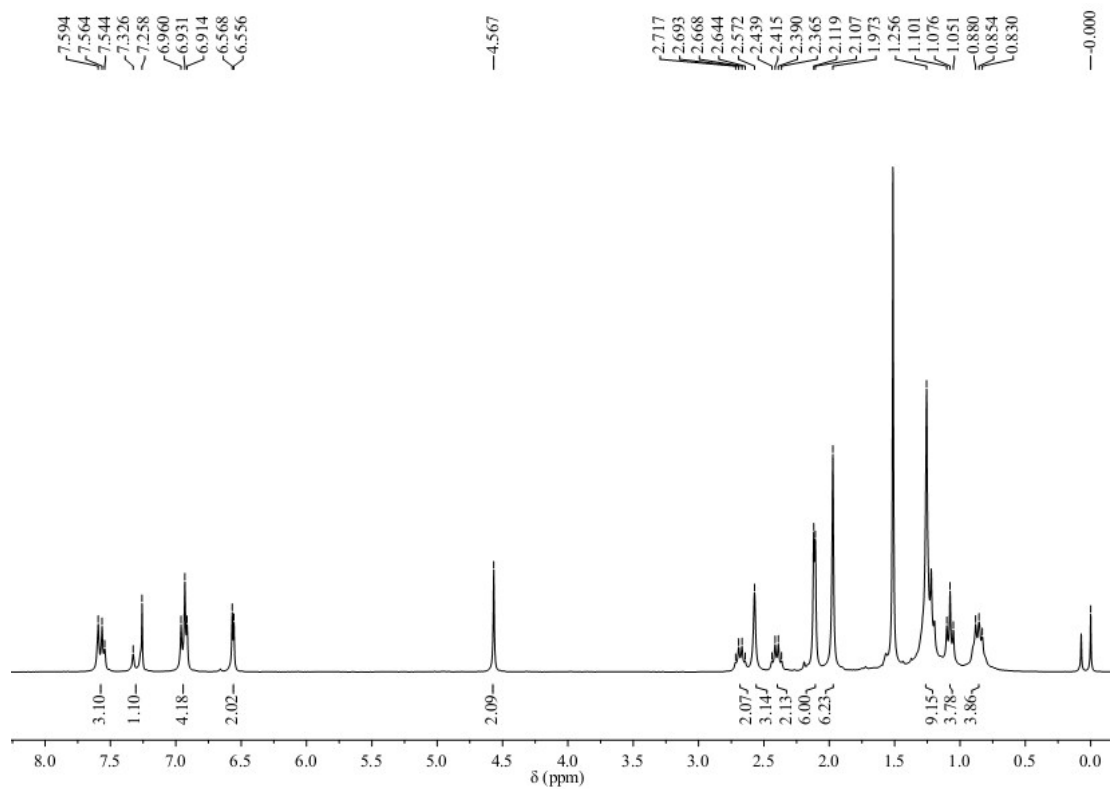

$^1\text{H}$  NMR spectrum of BBP **2a** in  $\text{CDCl}_3$  solution

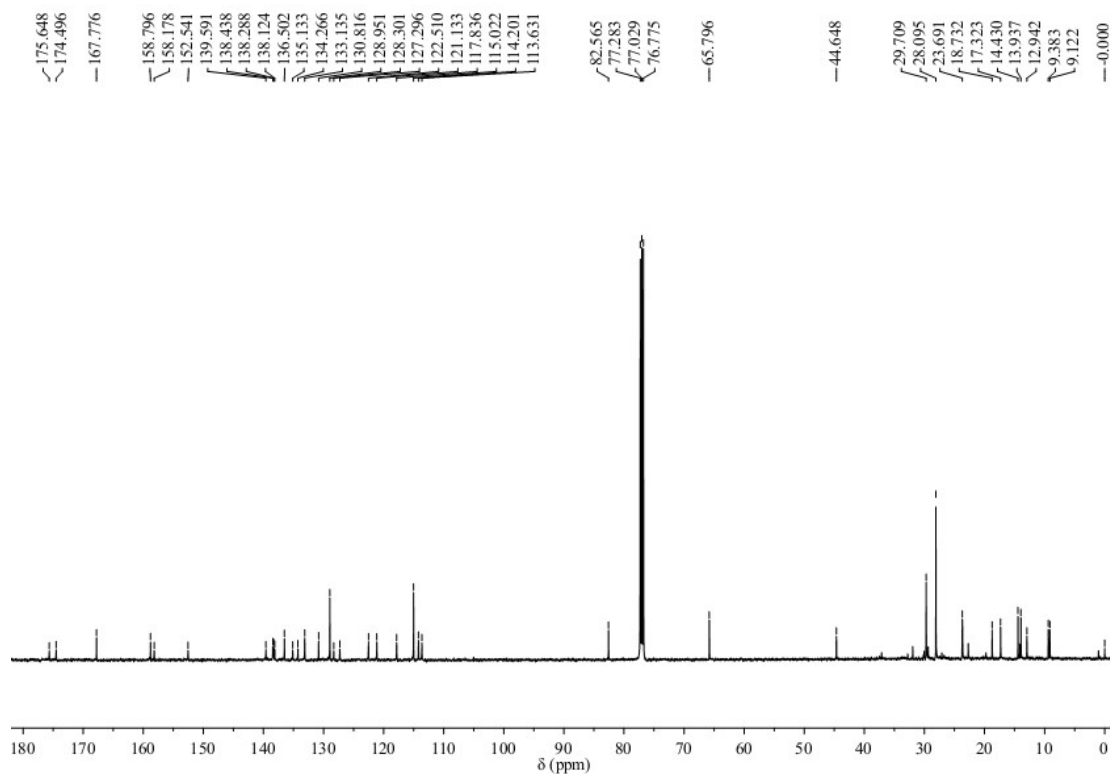

$^{13}\text{C}$  NMR spectrum of BBP **2a** in  $\text{CDCl}_3$  solution

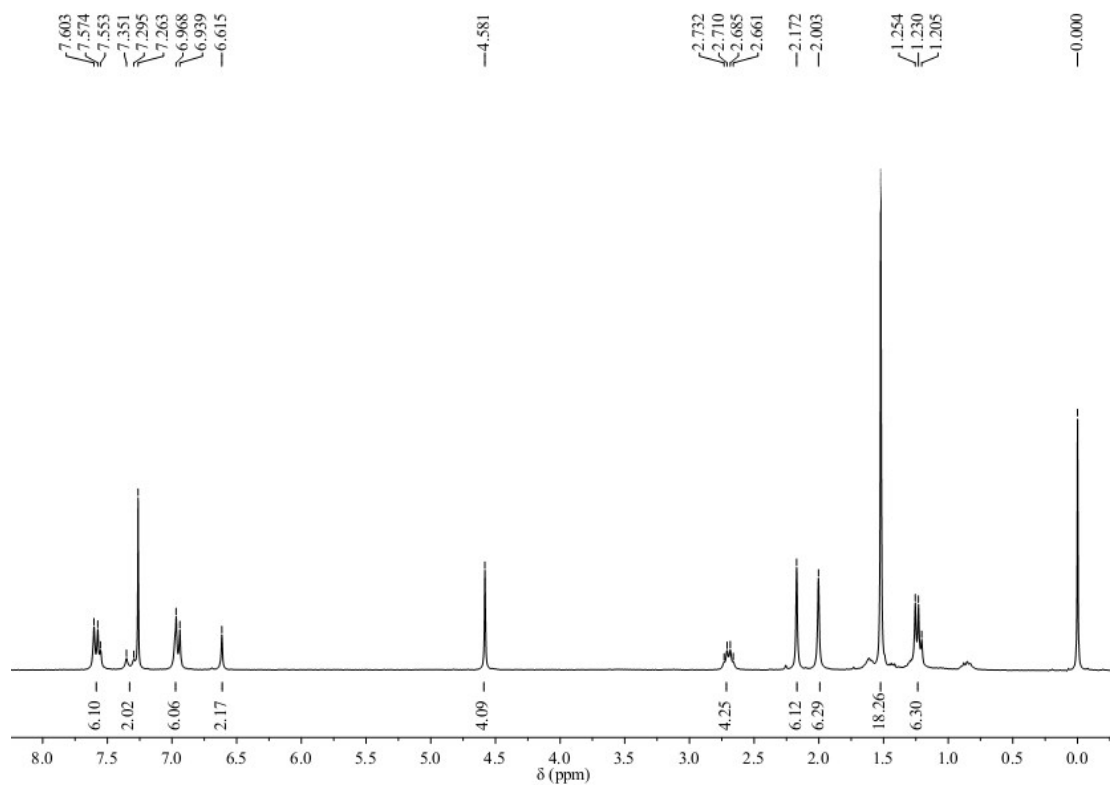

$^1\text{H}$  NMR spectrum of BBP **3a** in  $\text{CDCl}_3$  solution

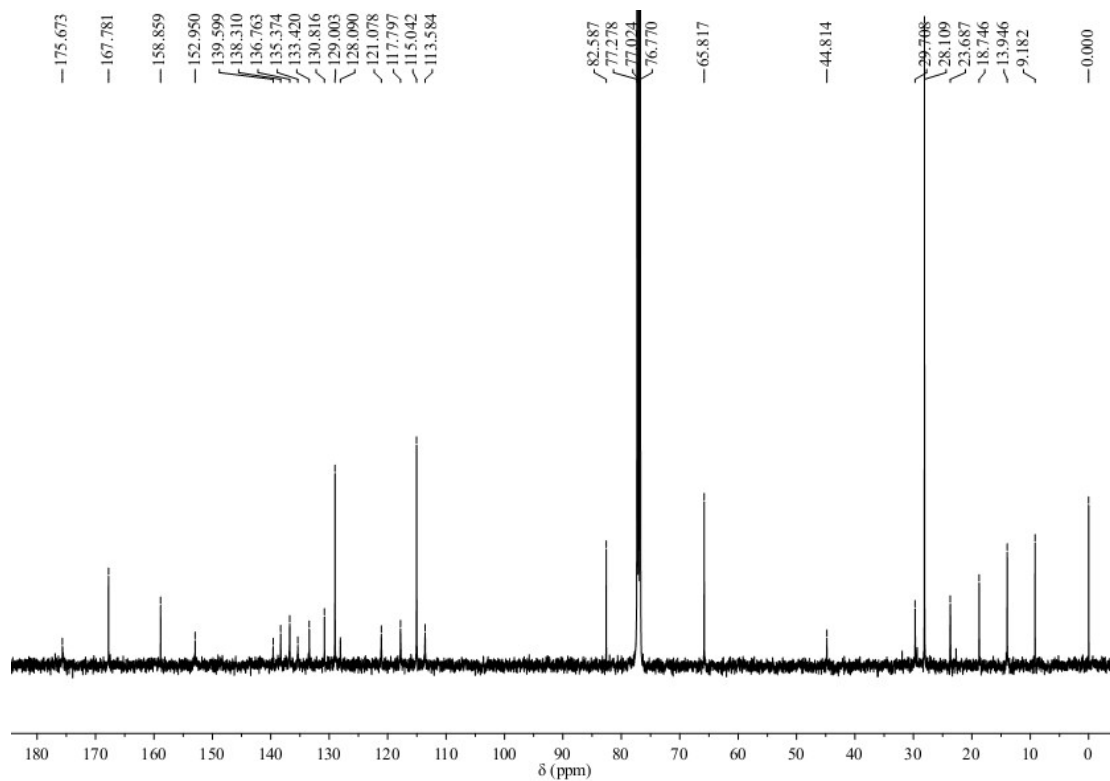

$^{13}\text{C}$  NMR spectrum of BBP **3a** in  $\text{CDCl}_3$  solution

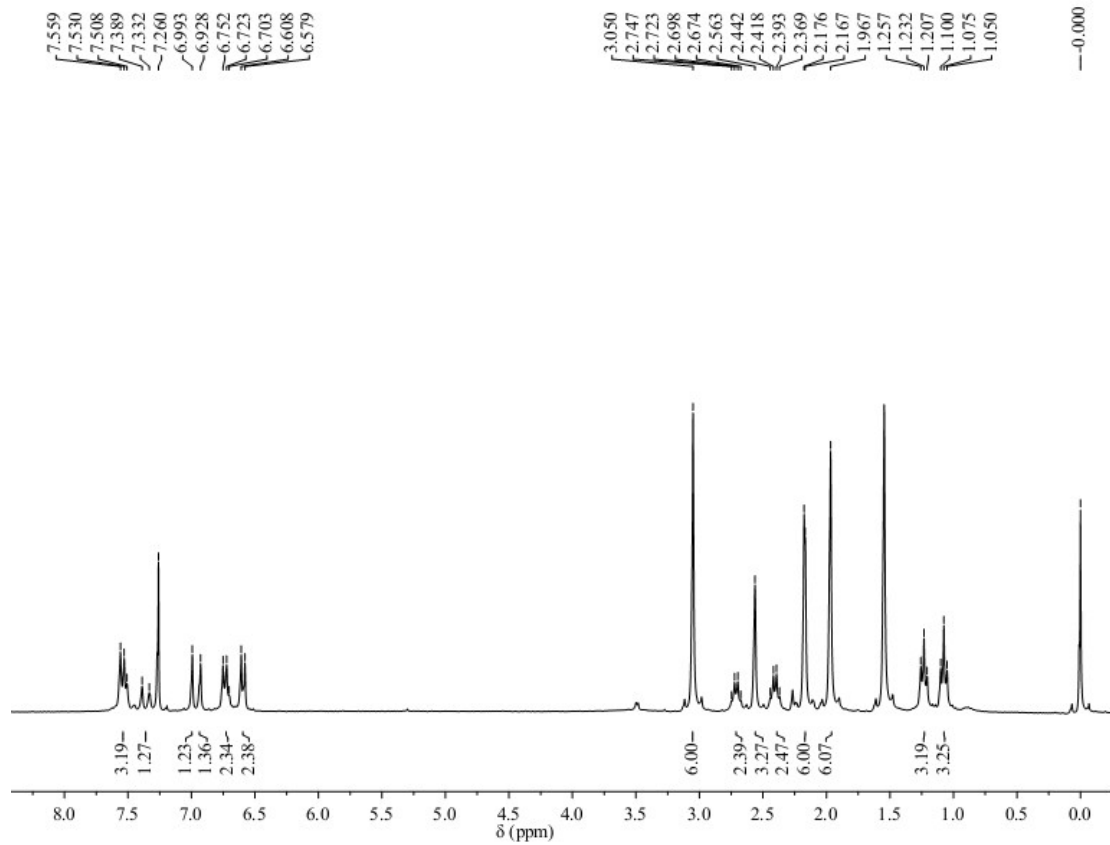

$^1\text{H}$  NMR spectrum of BBP **2b** in  $\text{CDCl}_3$  solution

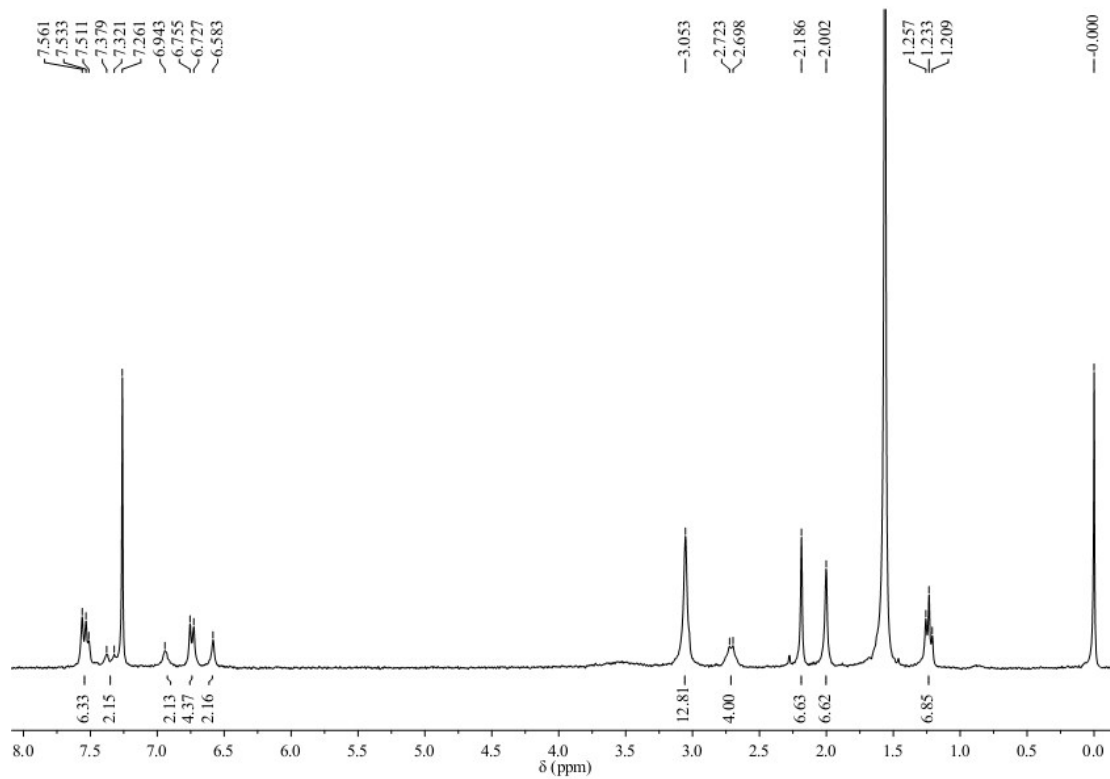

$^1\text{H}$  NMR spectrum of BBP **3b** in  $\text{CDCl}_3$  solution

## 7. High resolution mass spectrometers for the compounds

### HRMS for bisBODIPY 4

20141230\_APCH+Y16 #38 RT: 0.57 AV: 1 NL: 1.14E5  
T: FTMS +c.APCI corona Full ms [200.00-1000.00]

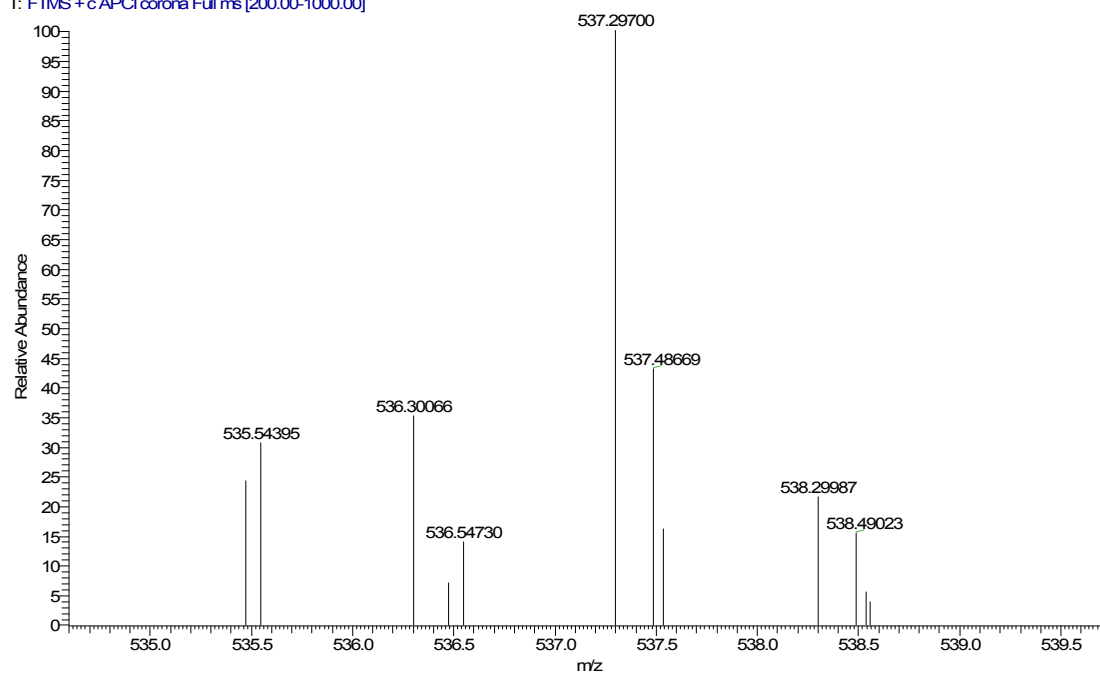

### HRMS for BBP 1

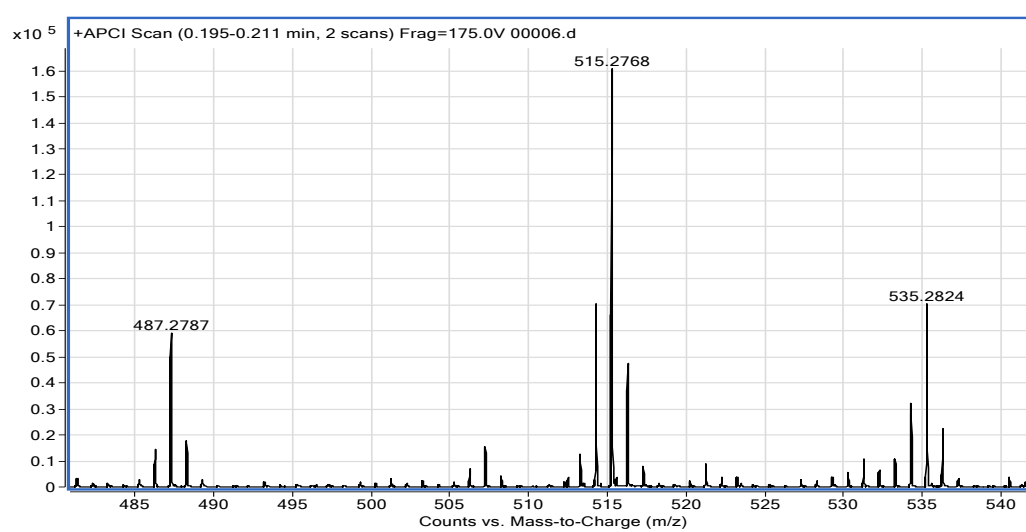



### HRMS for BBP 2a

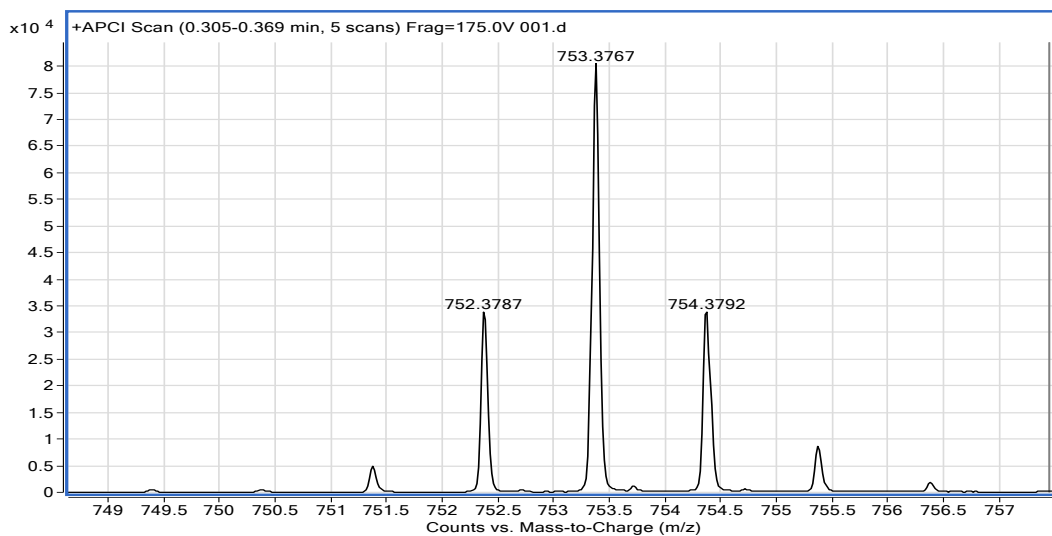

### HRMS for BBP 2b

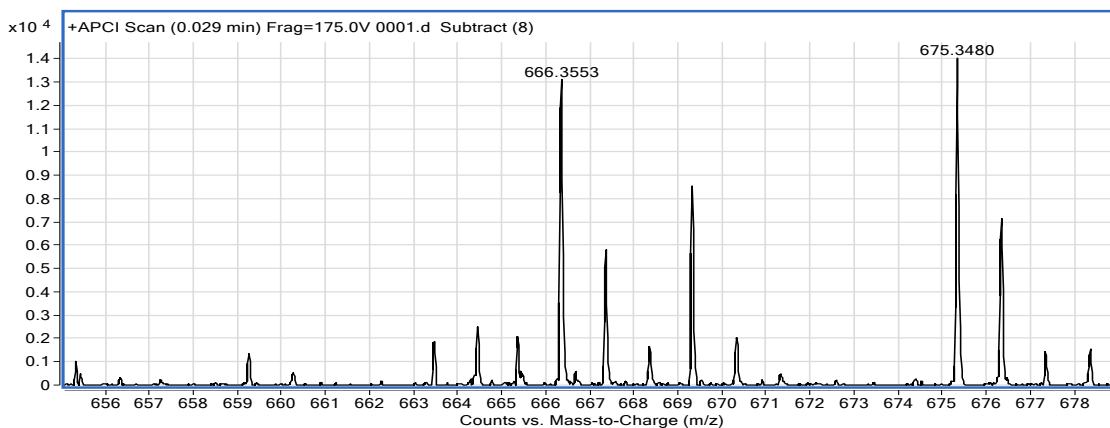

### HRMS for BBP 3a

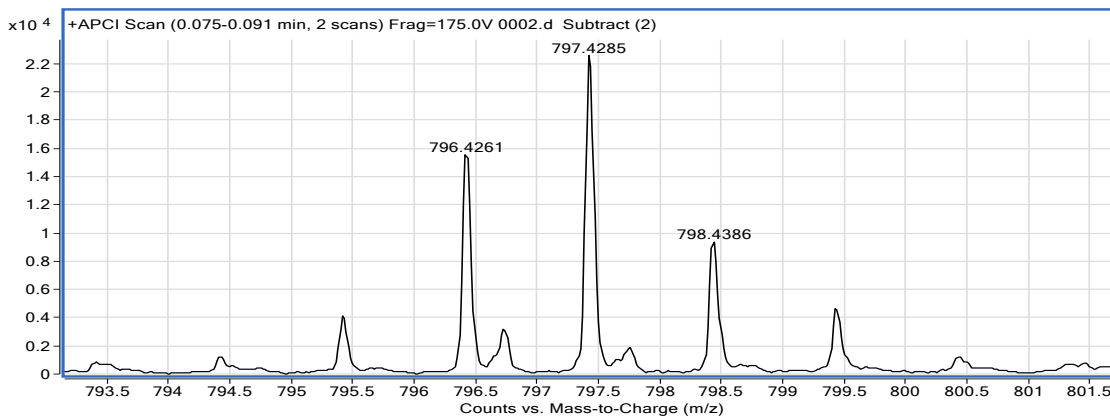

## HRMS for BBP 3b

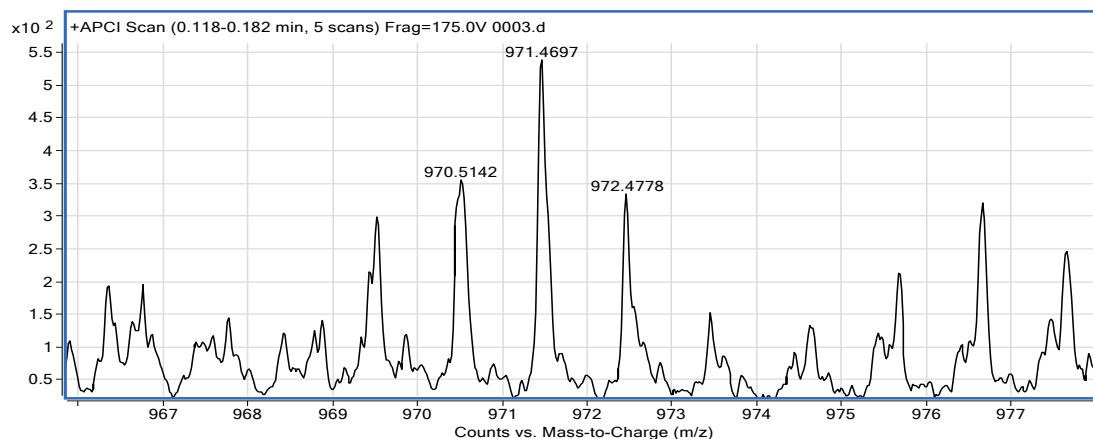

## 8. DFT calculation

The ground state geometry was optimized by using DFT method at TPSSH/6-31G (d) level. The same method was used for vibrational analysis to verify that the optimized structures correspond to local minima on the energy surface. TDDFT computations were used to obtain the vertical excitation energies and oscillator strengths at the optimized ground state equilibrium geometries under the TPSSH/6-311G (2d, p) theoretical level. The TDDFT of all the molecules in dichloromethane were using the Self-Consistent Reaction Field (SCRF) method and the Polarizable Continuum Model (PCM). All of the calculations for BODIPY **1**, BBP **1** and bisBODIPY **4** were carried out in dichloromethane by the methods implemented in Gaussian 09 package<sup>6</sup>.

### BBP 1:

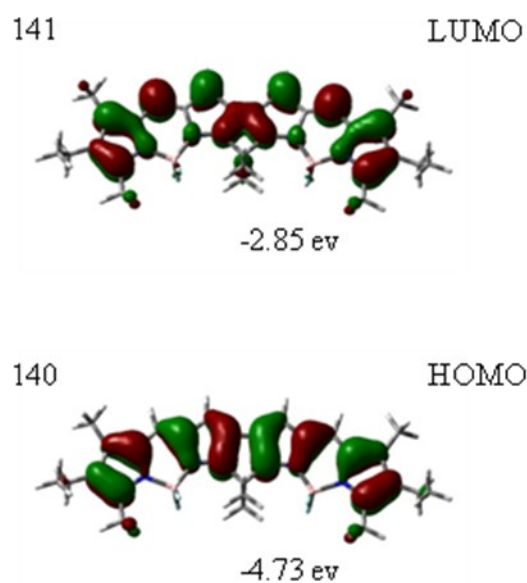

**Figure S23.** Frontier molecular orbitals (MO) and frontier orbital energy of BBP 1 calculated with

density functional theory (DFT) at the TPSSH /6-31G\* level using Gaussian 09.

Selected TDDFT paramete :

|                  |             |           |           |          |              |
|------------------|-------------|-----------|-----------|----------|--------------|
| Excited State 1: | Singlet-A'' | 1.9641 eV | 631.26 nm | f=1.0936 | <S**2>=0.000 |
| 140 → 141        | 0.70406     |           |           |          |              |
| Excited State 2: | Singlet-A'  | 2.2443 eV | 552.44 nm | f=0.0007 | <S**2>=0.000 |
| 139 → 141        | -0.37131    |           |           |          |              |
| 140 → 142        | 0.60051     |           |           |          |              |

**bisBODIPY 4 :**

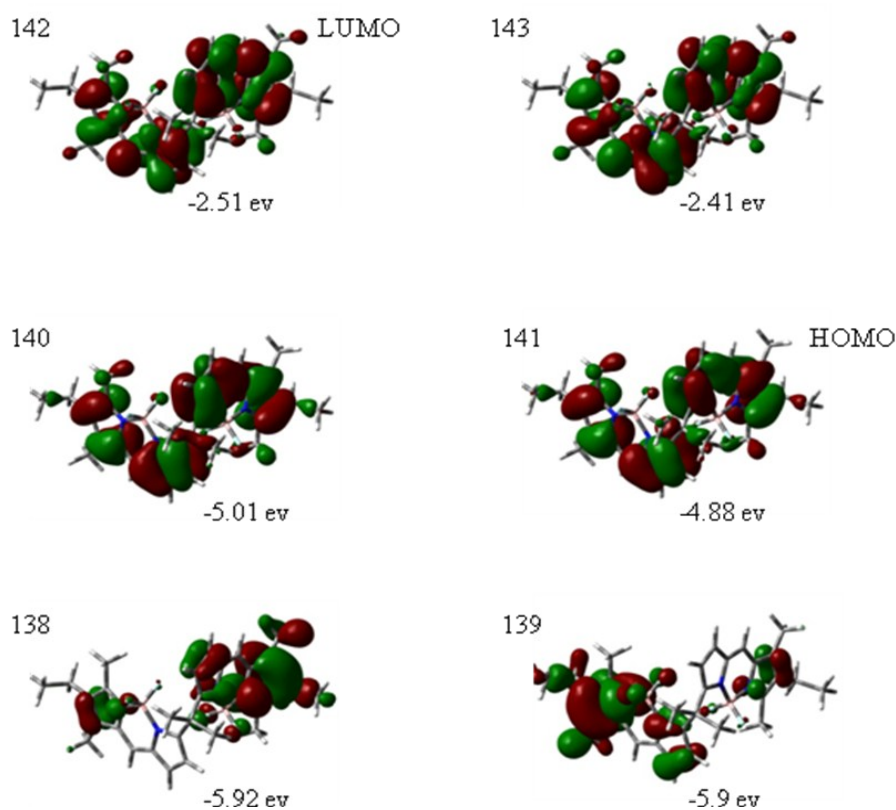

**Figure S24.** Frontier molecular orbitals (MO) and frontier orbital energy of bisBODIPY 4 calculated with density functional theory (DFT) at the TPSSH /6-31G\* level using Gaussian 09.

Selected TDDFT paramete :

|                  |           |           |           |          |              |
|------------------|-----------|-----------|-----------|----------|--------------|
| Excited State 1: | Singlet-A | 2.2342 eV | 554.95 nm | f=0.0481 | <S**2>=0.000 |
| 140 -> 142       | -0.20425  |           |           |          |              |
| 140 -> 143       | -0.31324  |           |           |          |              |
| 141 -> 142       | 0.56315   |           |           |          |              |
| 141 -> 143       | 0.20710   |           |           |          |              |
| Excited State 2: | Singlet-A | 2.2707 eV | 546.01 nm | f=0.0149 | <S**2>=0.000 |
| 140 -> 142       | -0.44244  |           |           |          |              |
| 140 -> 143       | 0.21871   |           |           |          |              |

|                  |           |           |           |          |              |  |
|------------------|-----------|-----------|-----------|----------|--------------|--|
| 141 -> 142       | -0.20850  |           |           |          |              |  |
| 141 -> 143       | 0.46126   |           |           |          |              |  |
| Excited State 3: | Singlet-A | 2.7741 eV | 446.93 nm | f=0.6367 | <S**2>=0.000 |  |
| 138 -> 142       | 0.10039   |           |           |          |              |  |
| 140 -> 143       | 0.58328   |           |           |          |              |  |
| 141 -> 142       | 0.36362   |           |           |          |              |  |
| Excited State 4: | Singlet-A | 2.8854 eV | 429.70 nm | f=0.4421 | <S**2>=0.000 |  |
| 138 -> 143       | 0.13644   |           |           |          |              |  |
| 139 -> 142       | -0.19859  |           |           |          |              |  |
| 140 -> 142       | 0.47724   |           |           |          |              |  |
| 141 -> 143       | 0.45798   |           |           |          |              |  |

### BODIPY M :

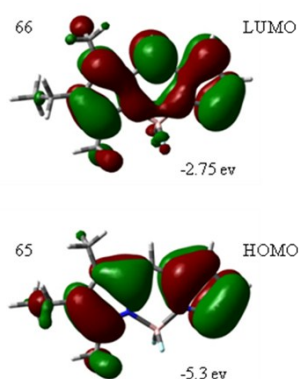

**Figure S25.** Frontier molecular orbitals (MO) and frontier orbital energy of BODIPY **M** calculated with density functional theory (DFT) at the TPSSH /6-31G\* level using Gaussian 09.

Selected TDDFT paramete :

|                  |           |           |           |          |              |
|------------------|-----------|-----------|-----------|----------|--------------|
| Excited State 1: | Singlet-A | 2.8931 eV | 428.55 nm | f=0.5090 | <S**2>=0.000 |
| 64 -> 66         | 0.24356   |           |           |          |              |
| 65 -> 66         | 0.66313   |           |           |          |              |
| 65 <- 66         | -0.10222  |           |           |          |              |
| Excited State 2: | Singlet-A | 3.2867 eV | 377.23 nm | f=0.2102 | <S**2>=0.000 |
| 64 -> 66         | 0.66055   |           |           |          |              |
| 65 -> 66         | -0.24401  |           |           |          |              |
| Excited State 3: | Singlet-A | 3.6583 eV | 338.91 nm | f=0.0748 | <S**2>=0.000 |
| 63 -> 66         | 0.69700   |           |           |          |              |

DFT optimized coordinates for BODIPY **M**, BBP **1** and bisBODIPY **4**

### BBP 1:

|   |           |          |          |
|---|-----------|----------|----------|
| B | 8.123800  | 6.190600 | 4.095200 |
| C | 10.380000 | 6.739500 | 2.870700 |

|   |           |          |          |
|---|-----------|----------|----------|
| C | 10.788900 | 7.414100 | 1.705300 |
| C | 9.659500  | 7.852100 | 1.047300 |
| C | 8.569500  | 7.437300 | 1.834600 |
| C | 7.198200  | 7.617200 | 1.641300 |
| C | 6.254700  | 7.153400 | 2.531900 |
| C | 4.835500  | 7.206300 | 2.531200 |
| C | 4.397400  | 6.602800 | 3.689600 |
| C | 5.556500  | 6.162900 | 4.393900 |
| C | 4.003700  | 7.772200 | 1.436700 |
| C | 3.014100  | 6.429800 | 4.175300 |
| C | 2.388700  | 5.089200 | 3.841400 |
| C | 5.632100  | 5.428400 | 5.685800 |
| C | 11.517500 | 6.160200 | 3.702200 |
| C | 11.517500 | 4.618000 | 3.610100 |
| C | 11.517500 | 6.590400 | 5.168500 |
| F | 8.311700  | 4.820900 | 4.195700 |
| F | 8.408700  | 6.787000 | 5.292200 |
| N | 9.040300  | 6.754100 | 2.974000 |
| N | 6.666600  | 6.486000 | 3.698000 |
| B | 14.911200 | 6.190600 | 4.095200 |
| C | 12.655000 | 6.739500 | 2.870700 |
| C | 12.246100 | 7.414100 | 1.705300 |
| C | 13.375500 | 7.852100 | 1.047300 |
| C | 14.465500 | 7.437300 | 1.834600 |
| C | 15.836800 | 7.617200 | 1.641300 |
| C | 16.780300 | 7.153400 | 2.531900 |
| C | 18.199500 | 7.206300 | 2.531200 |
| C | 18.637600 | 6.602800 | 3.689600 |
| C | 17.478500 | 6.162900 | 4.393900 |
| C | 19.031300 | 7.772200 | 1.436700 |
| C | 20.020900 | 6.429800 | 4.175300 |
| C | 20.646300 | 5.089200 | 3.841400 |
| C | 17.402900 | 5.428400 | 5.685800 |
| F | 14.723300 | 4.820900 | 4.195700 |
| F | 14.626300 | 6.787000 | 5.292200 |
| N | 13.994700 | 6.754100 | 2.974000 |
| N | 16.368400 | 6.486000 | 3.698000 |
| H | 9.624000  | 8.325500 | 0.246700 |
| H | 6.910500  | 8.068500 | 0.881400 |
| H | 3.600400  | 7.058100 | 0.939100 |
| H | 4.556300  | 8.297000 | 0.852600 |
| H | 3.317000  | 8.329100 | 1.811400 |
| H | 2.462400  | 7.131300 | 3.794300 |
| H | 3.008400  | 6.544000 | 5.139000 |

|   |           |          |          |
|---|-----------|----------|----------|
| H | 2.368000  | 4.973200 | 2.888300 |
| H | 1.495000  | 5.057100 | 4.187900 |
| H | 2.911600  | 4.385900 | 4.235700 |
| H | 5.894700  | 4.519800 | 5.522800 |
| H | 4.772900  | 5.440900 | 6.111800 |
| H | 6.277000  | 5.851400 | 6.256600 |
| H | 11.517500 | 4.355500 | 2.678100 |
| H | 10.941600 | 4.230600 | 4.252600 |
| H | 12.093400 | 4.230600 | 4.252600 |
| H | 10.752700 | 6.283400 | 5.672500 |
| H | 11.517500 | 7.545400 | 5.271800 |
| H | 12.282300 | 6.283400 | 5.672500 |
| H | 13.411000 | 8.325500 | 0.246700 |
| H | 16.124500 | 8.068500 | 0.881400 |
| H | 19.434600 | 7.058100 | 0.939100 |
| H | 18.478700 | 8.297000 | 0.852600 |
| H | 19.718000 | 8.329100 | 1.811400 |
| H | 20.572600 | 7.131300 | 3.794300 |
| H | 20.026600 | 6.544000 | 5.139000 |
| H | 20.667000 | 4.973200 | 2.888300 |
| H | 21.540000 | 5.057100 | 4.187900 |
| H | 20.123400 | 4.385900 | 4.235700 |
| H | 17.140300 | 4.519800 | 5.522800 |
| H | 18.262100 | 5.440900 | 6.111800 |
| H | 16.758000 | 5.851400 | 6.256600 |

**bisBODIPY 4 :**

|   |            |             |             |
|---|------------|-------------|-------------|
| B | 2.11100300 | 0.64415000  | 0.49751200  |
| C | 0.70110200 | 2.28820600  | -1.07090300 |
| C | 0.56662100 | 2.49724700  | -2.46542300 |
| C | 1.41753100 | 1.61776800  | -3.10651800 |
| C | 2.07191000 | 0.87379900  | -2.10067000 |
| C | 3.01132900 | -0.14383900 | -2.24521700 |
| C | 3.56613100 | -0.80295200 | -1.16106000 |
| C | 4.53313400 | -1.84510500 | -1.07713400 |
| C | 4.70907400 | -2.11432100 | 0.28116100  |
| C | 3.84652500 | -1.23240100 | 0.99408100  |
| C | 3.65845700 | -1.11539900 | 2.47208200  |
| C | 5.64961300 | -3.11712500 | 0.89190800  |
| C | 7.03002600 | -2.53202600 | 1.24636700  |
| C | 5.22407700 | -2.49830500 | -2.23575100 |
| C | 0.00026500 | 3.11793500  | 0.00238500  |
| C | 1.06524300 | 4.04948900  | 0.64771200  |

|   |             |             |             |
|---|-------------|-------------|-------------|
| F | 1.05339700  | 0.04122000  | 1.15961900  |
| F | 2.74025200  | 1.58439700  | 1.31765000  |
| N | 1.62566200  | 1.31334900  | -0.85018900 |
| N | 3.17016700  | -0.45506900 | 0.12609400  |
| B | -2.11348800 | 0.64744500  | -0.49687700 |
| C | -0.70021400 | 2.28608400  | 1.07426600  |
| C | -0.56412100 | 2.49149100  | 2.46915900  |
| C | -1.41481100 | 1.61083400  | 3.10892900  |
| C | -2.07061000 | 0.86974400  | 2.10189400  |
| C | -3.00976300 | -0.14835800 | 2.24494600  |
| C | -3.56523000 | -0.80524700 | 1.15980000  |
| C | -4.53165300 | -1.84782000 | 1.07438900  |
| C | -4.70852400 | -2.11419100 | -0.28434100 |
| C | -3.84716800 | -1.23011100 | -0.99603700 |
| C | -3.66067400 | -1.10949200 | -2.47394400 |
| C | -5.64884900 | -3.11632600 | -0.89651400 |
| C | -7.02984300 | -2.53135100 | -1.24891600 |
| C | -5.22119500 | -2.50400000 | 2.23215700  |
| C | -1.06481200 | 4.05046600  | -0.64131600 |
| F | -1.05682800 | 0.04832000  | -1.16390000 |
| F | -2.74596000 | 1.58993700  | -1.31198600 |
| N | -1.62558200 | 1.31230100  | 0.85205900  |
| N | -3.17052100 | -0.45431000 | -0.12691000 |
| H | -0.10558000 | 3.20271200  | -2.92857500 |
| H | 1.56639400  | 1.49376400  | -4.17144800 |
| H | 3.31149100  | -0.42070500 | -3.25120000 |
| H | 4.06454100  | -0.16503000 | 2.83750200  |
| H | 4.15525300  | -1.93419900 | 2.99820700  |
| H | 2.59296800  | -1.11921200 | 2.72013300  |
| H | 5.20123500  | -3.54878000 | 1.79589700  |
| H | 5.78586400  | -3.95557000 | 0.19686600  |
| H | 7.52525600  | -2.12668600 | 0.35687600  |
| H | 7.68217900  | -3.30011100 | 1.67846800  |
| H | 6.93817600  | -1.71692000 | 1.97283000  |
| H | 5.29436100  | -3.58345800 | -2.09680000 |
| H | 6.24934400  | -2.12503500 | -2.36100700 |
| H | 4.69504600  | -2.32153700 | -3.17756300 |
| H | 0.58298900  | 4.76090900  | 1.32667900  |
| H | 1.55548300  | 4.62531800  | -0.14383500 |
| H | 1.82520200  | 3.48459800  | 1.18514000  |
| H | 0.10904600  | 3.19532400  | 2.93337700  |
| H | -1.56250200 | 1.48410200  | 4.17370100  |
| H | -3.30888300 | -0.42766100 | 3.25056500  |
| H | -4.06755600 | -0.15839000 | -2.83657100 |

|   |             |             |             |
|---|-------------|-------------|-------------|
| H | -4.15768800 | -1.92720600 | -3.00154700 |
| H | -2.59545000 | -1.11220600 | -2.72311900 |
| H | -5.20078500 | -3.54587800 | -1.80166000 |
| H | -5.78414400 | -3.95625100 | -0.20307900 |
| H | -7.52475100 | -2.12808400 | -0.35830400 |
| H | -7.68180900 | -3.29896600 | -1.68213400 |
| H | -6.93894500 | -1.71474600 | -1.97381100 |
| H | -5.29070900 | -3.58891900 | 2.09101900  |
| H | -6.24666900 | -2.13181600 | 2.35894700  |
| H | -4.69161200 | -2.32875300 | 3.17394200  |
| H | -0.58260600 | 4.76346700  | -1.31865500 |
| H | -1.55543500 | 4.62450100  | 0.15129800  |
| H | -1.82452400 | 3.48653100  | -1.18008900 |

**BODIPY M :**

|   |             |             |             |
|---|-------------|-------------|-------------|
| B | 1.13015400  | -1.25682600 | -0.03257400 |
| C | 3.61266600  | -0.49856400 | 0.16761100  |
| C | 4.36495100  | 0.69089100  | 0.22426000  |
| C | 3.45531000  | 1.74303900  | 0.15413900  |
| C | 2.16435000  | 1.16809200  | 0.05623900  |
| C | 0.89597400  | 1.75185900  | -0.03954900 |
| C | -0.25989100 | 0.99100700  | -0.12279700 |
| C | -1.63251300 | 1.37914400  | -0.21706000 |
| C | -2.37640800 | 0.20147500  | -0.27475500 |
| C | -1.44588500 | -0.88068700 | -0.21357200 |
| C | -2.14243900 | 2.78921100  | -0.22525200 |
| C | -3.87272200 | 0.06394100  | -0.35031300 |
| C | -4.40985258 | 0.05225931  | -1.79497682 |
| C | -1.72334300 | -2.34903800 | -0.23810700 |
| F | 1.09905500  | -2.05102600 | 1.10584400  |
| F | 1.27849300  | -2.02607700 | -1.17983500 |
| N | 2.29985300  | -0.21699100 | 0.06798600  |
| N | -0.19043900 | -0.40381700 | -0.12407900 |
| H | 3.66839400  | 2.80392700  | 0.17054600  |
| H | 0.82015500  | 2.83492200  | -0.04504600 |
| H | -2.37931400 | 3.13624400  | 0.78931000  |
| H | -1.40795300 | 3.48320000  | -0.64700800 |
| H | -3.05869300 | 2.87345600  | -0.81908900 |
| H | -4.17792317 | -0.86175208 | 0.15309226  |
| H | -4.34984663 | 0.88244875  | 0.20384323  |
| H | -3.98265340 | -0.78093389 | -2.36336156 |
| H | -5.50103268 | -0.05024893 | -1.80324554 |
| H | -4.15001210 | 0.97951271  | -2.31722413 |
| H | -1.42552200 | -2.80558800 | 0.71245800  |



|   |             |             |             |
|---|-------------|-------------|-------------|
| H | -2.78363100 | -2.54660500 | -0.41222800 |
| H | -1.12956700 | -2.83170800 | -1.02075300 |
| H | 5.44122700  | 0.75431000  | 0.30676400  |
| H | 3.95089800  | -1.52534300 | 0.19276100  |

#### Reference:

- (1) Sheldrick, G. M. *SADABS: Program for Empirical Absorption Correction of Area Detector Data*; University of Göttingen, Germany, 1996.
- (2) G. M. Sheldrick, *SHELXTL 5.10 for Windows NT: Structure Determination Software Programs*; Bruker Analytical X-ray Systems, Inc., Madison, WI, 1997.
- (3) (a) M. Zhang, E. Hao, Y. Xu, S. Zhang, H. Zhu, Q. Wang, C. Yu, L. Jiao, *RSC. Adv.*, 2012, **2**, 11215; (b) K. G. Casey, E. L. Quitevis, *J Phys. Chem.*, 1988, **92**, 6590; (c) J. Killoran, L. Allen, J. F. Gallagher, W. M. Gallagher, D. F. O'Shea, *Chem. Commun.* 2002, 1862; (d) R. C. Benson, H. A. Kues, *Phys. Med. Biol.*, 1978, **23**, 159; (e) J. R. Lakowicz, *Principles of Fluorescence Spectroscopy*, Springer: New York, 2006.
- (4) R. Li, T. A. Mulder, U. Beckmann, P. D. W. Boyd and S. Brooker, *Inorganica Chimica Acta.*, 2004, **357**, 3360.
- (5) (a) C. Yu, Y. Xu, L. Jiao, J. Zhou, Z. Wang, E. Hao, *Chem. Eur. J.* 2012, **18**, 6437; (b) L. Jiao, C. Yu, M. Liu, Y. Wu, K. Cong, T. Meng, Y. Wang, E. Hao, *J. Org. Chem.* 2010, **75**, 6035.
- (6) Gaussian 09, Revision D.01, M. J. Frisch, G. W. Trucks, H. B. Schlegel, G. E. Scuseria, M. A. Robb, J. R. Cheeseman, G. Scalmani, V. Barone, B. Mennucci, G. A. Petersson, H. Nakatsuji, M. Caricato, X. Li, H. P. Hratchian, A. F. Izmaylov, J. Bloino, G. Zheng, J. L. Sonnenberg, M. Hada, M. Ehara, K. Toyota, R. Fukuda, J. Hasegawa, M. Ishida, T. Nakajima, Y. Honda, O. Kitao, H. Nakai, T. Vreven, J. A. Montgomery, Jr., J. E. Peralta, F. Ogliaro, M. Bearpark, J. J. Heyd, E. Brothers, K. N. Kudin, V. N. Staroverov, T. Keith, R. Kobayashi, J. Normand, K. Raghavachari, A. Rendell, J. C. Burant, S. S. Iyengar, J. Tomasi, M. Cossi, N. Rega, J. M. Millam, M. Klene, J. E. Knox, J. B. Cross, V. Bakken, C. Adamo, J. Jaramillo, R. Gomperts, R. E. Stratmann, O. Yazyev, A. J. Austin, R. Cammi, C. Pomelli, J. W. Ochterski, R. L. Martin, K. Morokuma, V. G. Zakrzewski, G. A. Voth, P. Salvador, J. J. Dannenberg, S. Dapprich, A. D. Daniels, O. Farkas, J. B. Foresman, J. V. Ortiz, J. Cioslowski, and D. J. Fox, Gaussian, Inc., Wallingford CT, 2013.
